# Supplementary material for: The G4Foam Experiment: Global Climate Impacts of Regional Ocean Albedo Modification
Source: Copernicus journal article supplement (doi:10.5194/acp-2016-849), 2016-10-05
Supplement: Supplementary file [file acp-2016-849-AC4-supplement.pdf]

1

**The G4Foam Experiment:  
Global Climate Impacts of Regional Ocean Albedo Modification**

Corey J. Gabriel<sup>1\*</sup>, Alan Robock<sup>1</sup>, Lili Xia<sup>1</sup>, Brian Zambri<sup>1</sup>, and Ben Kravitz<sup>2</sup>

<sup>1</sup>Department of Environmental Sciences, Rutgers University, New Brunswick, NJ, USA

2 <sup>2</sup>Atmospheric Sciences and Global Change Division, Pacific Northwest National Laboratory,  
3 Richland, Washington, USA

Submitted to *Atmospheric Chemistry and Physics*  
Special Issue: The Geoengineering Model Intercomparison Project

September, 2016

Revised December, 2016

\*To whom correspondence should be addressed: Corey J. Gabriel, Department of Environmental Sciences, Rutgers University, 14 College Farm Road, New Brunswick, NJ 08901-8551. E-mail: corey@envsci.rutgers.edu.

4

5 **Abstract.** Reducing insolation has been proposed as a geoengineering response to global  
6 warming. Here we present the results of climate model simulations of a unique Geoengineering  
7 Model Intercomparison Project Testbed experiment to investigate the benefits and risks of a  
8 scheme that would brighten certain oceanic regions. The National Center for Atmospheric  
9 Research CESM-CAM4-CHEM global climate model was modified to simulate a scheme in  
10 which the albedo of the ocean surface is increased over the subtropical ocean gyres in the  
11 Southern Hemisphere. In theory, this could be accomplished using a stable, nondispersive foam,  
12 comprised of tiny, highly reflective microbubbles. Such a foam has been developed under  
13 idealized conditions, although deployment at a large scale is presently infeasible. We conducted  
14 three ensemble members of a simulation (G4Foam) from 2020 through 2069 in which the albedo  
15 of the ocean surface is set to 0.15 (an increase of 150%) over the three subtropical ocean gyres in  
16 the Southern Hemisphere, against a background of the RCP6.0 (representative concentration  
17 pathway resulting in  $+6 \text{ W m}^{-2}$  radiative forcing by 2100) scenario. After 2069, geoengineering  
18 is ceased, and the simulation is run for an additional 20 years. Global mean surface temperature  
19 in G4Foam is 0.6 K lower than RCP6.0, with statistically significant cooling relative to RCP6.0  
20 south of  $30^\circ\text{N}$ . There is an increase in rainfall over land, most pronouncedly in the tropics during  
21 the June-July-August season, relative to both G4SSA (specified stratospheric aerosols) and  
22 RCP6.0. Heavily populated and highly cultivated regions throughout the tropics, including the  
23 Sahel, Southern Asia, the Maritime Continent, Central America and much of the Amazon,  
24 experience a statistically significant increase in precipitation minus evaporation. The  
25 temperature response to the relatively modest global average forcing of  $-1.5 \text{ W m}^{-2}$  is amplified  
26 through a series of positive cloud feedbacks, in which more shortwave radiation is reflected. The  
27 precipitation response is primarily the result of the intensification of the southern Hadley cell, as  
28 its mean position migrates northward and away from the Equator in response to the asymmetric  
29 cooling.  
30

## 31 **1 Introduction**

### 32 **1.1 Background**

33 The current rate of increase in global mean surface temperature is unprecedented in the  
34 last 1,000 years (Marcott et al., 2013). The atmospheric concentration of CO<sub>2</sub> is higher now than  
35 at any time in the last 650,000 years (Siegenthaler et al., 2005). It is extremely likely that the  
36 warming since 1950 is primarily the result of anthropogenic emission of heat-trapping gases  
37 rather than natural climate variability (IPCC, 2013). Motivated by insufficient progress in  
38 setting and achieving mitigation targets, solar radiation management (SRM) has been proposed  
39 as a method of reducing global mean temperature, thereby ameliorating many of the negative  
40 effects of global warming (Crutzen, 2006). The most discussed SRM approach involves  
41 injection of sulfur dioxide (SO<sub>2</sub>) into the tropical stratosphere. Other suggested SRM  
42 geoengineering methods include marine cloud brightening (Jones et al., 2009; Rasch et al., 2009;  
43 Latham et al., 2010) and surface albedo modification (Irvine et al., 2010; Cvijanovic et al.,  
44 2015). Each of these methods has the potential to cool Earth's surface, but each comes with  
45 known potential side effects. For example, Robock (2008, 2014, 2016) enumerated and  
46 described specific risks and benefits of stratospheric geoengineering.

47 Here we present a Geoengineering Model intercomparison Project (GeoMIP) testbed  
48 experiment (Kravitz et al., 2011, 2016), consisting of the novel implementation of an ocean  
49 surface albedo modification scheme in a climate model, which simulates the placement of a  
50 reflective foam, consisting of microbubbles, on the ocean surface. RCP6.0 and G4SSA are run  
51 with an ocean surface albedo with a very small diurnal cycle, and the daily average albedo is  
52 very close to 0.06. In our experiment, the albedo of the ocean surface is raised from this daily  
53 mean of 0.06 to a constant value of 0.15, with no daily cycle, over the subtropical ocean gyres in  
54 the Southern Hemisphere, specifically 20°N-20°S, 90°W-170°W (South Pacific), 20°N-20°S,  
55 30°W-0°E (South Atlantic) and 20°N-20°S, 55°E-105°E (South Indian) (Fig. 1). Everywhere  
56 else, ocean surface albedo in G4Foam is calculated in the same way as in RCP6.0 and G4SSA.  
57 It is possible that the absence of a small daily cycle in albedo would result in a slightly different  
58 surface energy budget than would occur if the foamed regions exhibited variations in albedo.  
59 However, the foamed regions' albedos would likely fluctuate as a function of many things,  
60 including some movement of the foam itself, foam interaction with precipitation or aerosols,  
61 wind speed, and sun angle. Further study of the properties of the foam, including in ocean water  
62 with some turbulence, could provide information that would allow future modeling of the foam  
63 to include albedo fluctuations. This is the G4Foam experiment, which simulates a particular  
64 implementation of an idealized form of the technology described by Aziz et al. (2014), where  
65 stable, reflective foam suitable for use as SRM in ocean regions with limited nutrients that  
66 support little marine life is made in the laboratory.

67 The broad idea of microbubble deployment as a form of SRM is explored by Seitz  
68 (2010). Here we only examine the potential benefits and risks of such a scheme, and do not  
69 advocate deployment of any form of geoengineering regardless of its present feasibility. Robock  
70 (2011) has cautioned against the potential implications of ocean albedo modification as presented  
71 by Seitz (2010).

72 Stratospheric sulfate injection (SSI) is the most discussed form of geoengineering and,  
73 given the current state of research, the most feasible (Dykema et al., 2014, Keith et al., 2014).  
74 Implementation of the G4Foam regional ocean albedo modification scheme could be considered  
75 with or without concurrent SSI. G4Foam could be used as a potential SSI concurrent scheme  
76 aimed at correcting possible adverse impacts on the hydrological cycle brought about by ongoing  
77 SSI. G4Foam is also a potential alternative to SSI with a far different latitudinal distribution of

78 benefits. The focus here is solely on the second scenario, as it allows for the elucidation of the  
79 impacts of the G4Foam experiment forcing alone.

## 80 **1.2 Motivation and Research Question**

81 Is it possible to cool the planet while concurrently maintaining or increasing precipitation  
82 in highly populated and heavily cultivated regions, particularly in regions dependent on monsoon  
83 precipitation? We begin by determining whether a forcing can be applied in a global climate  
84 model (GCM) that will result in the model responding with a northward and landward shift of  
85 tropical precipitation needed to achieve our objective. To that end we conducted simulations  
86 with The Community Earth System Model 1/Community Atmospheric Model 4 fully coupled to  
87 tropospheric and stratospheric chemistry (CESM1 CAM4–Chem) model (Lamarque et al., 2012;  
88 Tilmes et al., 2015, 2016). We ran the model with horizontal resolution of  $0.9^\circ \times 1.25^\circ$  lat-lon  
89 and 26 levels from the surface to about 40 km (3.5 mb), as was done for G4SSA (specified  
90 stratospheric aerosol) by Xia et al. (2016).

91 The experiments consisted of three ensemble members of a simulation from 2020-2089 in  
92 which the ocean surface albedo is raised as described above from an average of 0.06, which  
93 includes a small diurnal cycle of albedo, to a daytime constant 0.15 on the SH subtropical ocean  
94 gyres for 50 years, 2020-2069, and then returned to unforced values from 2070-2089 to assess  
95 termination. Our hypothesis is that the tropical rain belts will move northward largely as a result  
96 of increased moisture convergence over land regions, particularly during Northern Hemisphere  
97 (NH) summer (June-July-August, JJA) in NH monsoon regions. Enhanced divergence over the  
98 already strong subtropical highs, due to increased subsidence over the increased albedo ocean  
99 regions in the subtropical Southern Hemisphere (SH), would help the cooler air from the forced  
100 subtropical regions advect throughout the SH troposphere.

101 The asymmetric cooling would force changes in the Hadley Cell, enhancing cross-  
102 equatorial flow, which would cool the surface in the NH tropics, especially during JJA, when  
103 heat mortality and morbidity is highest. However, despite a reduction in the JJA mean  
104 temperature in the tropics, extreme events are responsible for most heat-related mortality and  
105 morbidity, and the reduction in the mean temperature does not necessarily mean that there will  
106 be a reduction in the type of extreme heat events that cause human tragedy. While Kharin et al.  
107 (2007) showed that, in general, temperature extremes track with the mean temperature, this is not  
108 always the case. The changes in extreme events may, for example, be greater at high latitudes  
109 and the variability of temperatures over land may increase in a warmer climate.

110 Specific to geoengineering, Aswathy et al. (2015) showed that different climate  
111 engineering methods produce spatially heterogeneous changes in extreme precipitation and  
112 temperature events. They showed that one SRM scheme may be more effective than another in  
113 reducing different types of extreme events despite relatively similar global and regional mean  
114 responses. In particular, a marine cloud brightening scheme that brightens ocean areas between  
115  $30^\circ\text{N}$  and  $30^\circ\text{S}$  is shown to be less effective in reducing extreme precipitation and temperature  
116 events over land than the G3 experiment is.

117 Finally, the resulting cooling of low latitude NH land areas would not dampen the  
118 monsoon. The wet season monsoon circulation is initiated and maintained by the moist static  
119 energy gradient, not the surface temperature gradient. A wetter, more cloudy land mass will  
120 strengthen, not dampen the circulation relative to a warmer, drier continent (Hurley and Boos,  
121 2014), especially with a cooler, lower specific humidity environment under the descending  
122 branch of the meridional circulation.

123 The strength of this response will be very sensitive to any cloud feedbacks that result  
124 from the surface albedo forcing. The basis of this comprehensive hypothesis is described in

125 detail, below, specifically in sections 1.3 and 1.4. The details of the experiment are discussed in  
126 detail in section 2.

### 127 **1.3 Stratospheric geoengineering weakens the hydrological cycle**

128 With global warming, low-level specific humidity will increase by about  $7\% K^{-1}$  within  
129 the tropical planetary boundary layer. This response will be spatially homogeneous throughout  
130 the tropics. However, the precipitation response will be different. Increased moisture  
131 convergence in areas that already get a lot of precipitation will result in the “wet getting wetter,”  
132 while increased moisture divergence in dry areas will result in the “dry getting drier” (Held and  
133 Soden, 2006).

134 The “rich get richer, poor get poorer” paradigm does not hold up in an SRM world, where  
135 the response is very different from that under global warming. Based on the results of an  
136 observational study, Trenberth and Dai (2007) pointed out the possibility that drought,  
137 particularly in the tropics, could result from geoengineering. Tilmes et al. (2013) analyzed the  
138 hydrological cycle in most of the GeoMIP participating Coupled Model Intercomparison Project  
139 5 (CMIP5) (Taylor et al., 2012) models by comparing abrupt  $4xCO_2$ , piControl, and G1. They  
140 found a robust reduction in global monsoon rainfall, including in the Asian and West African  
141 monsoon regions in G1 relative to both abrupt  $4xCO_2$  and piControl. Haywood et al. (2013)  
142 explored the impact of SSI in one hemisphere only and found a movement of the ITCZ away  
143 from the hemisphere that was cooler as a result of the asymmetric SSI.

144 This consensus about the potential for less tropical rainfall under a regime of  
145 stratospheric SRM motivates us to identify an alternative or SSI-adjunctive geoengineering  
146 approach that could cool the planet, without reducing monsoon precipitation in highly cultivated  
147 areas.

### 148 **1.4 Extratropical forcing impacts the position of the ITCZ**

149 Under global warming tropical rainbelts will move toward the hemisphere that warms  
150 more (Chiang and Bitz, 2005, Frierson and Hwang, 2012). This ITCZ migration was first seen in  
151 early atmosphere-ocean coupled models. Clouds were prescribed in those models, and when  
152 clouds were changed in such a way to preferentially cool one hemisphere, the ITCZ responded to  
153 changes by moving toward the warmer hemisphere. Increasing low cloud cover, and thereby  
154 inducing cooling, in one hemisphere relative to the other caused the tropical rainbelts over the  
155 Pacific Ocean to move toward the other hemisphere (Manabe and Stouffer, 1980). The impacts  
156 of asymmetric heating of the hemispheres became highly relevant during the Sahel drought.  
157 Much of the rainfall deficit during the devastating 20-30 year drought can be attributed to  
158 cooling initiated by increased tropospheric sulfate emissions in the NH (Hwang et al., 2013).  
159 The forced cooling over the NH was enhanced by a positive dynamical feedback in the North  
160 Atlantic Ocean. (Broccoli et al. 2006; Kang et al. 2008) and the ITCZ and associated tropical  
161 rainbelts migrated south. Since the Sahel is at the northern margin of the ITCZs annual  
162 migration, or at the northern terminus of the West African monsoon, southward displacement of  
163 the ITCZ led to a devastating drought (Folland, 1986).

164 Broccoli et al. (2006) diagnosed the energy balance mechanism that causes the ITCZ to  
165 shift in response to asymmetric heating of the extratropics. Using models of varying complexity,  
166 Broccoli et al. (2006) imposed an anomalous cooling of the NH, either via a last glacial  
167 maximum simulation, or via hosing of the North Atlantic. The heating asymmetry causes the  
168 extratropics in the NH to demand more heat and the extratropics in the SH to demand less heat.  
169 Since cross equatorial heat transport is achieved principally via the Hadley Cell, the SH Hadley  
170 Cell strengthens, particularly in austral summer, in response to the NH cooling, and net energy  
171 flow in the upper branch intensifies, redistributing energy into the NH from the relatively warm  
172 SH.

173 Net flow of energy in the Hadley cell can be described in terms of the flow of moist static  
174 energy, which flows in the direction of the upper troposphere branch of the Hadley Cell. This is  
175 because moist static energy is higher at higher altitudes in the troposphere due to the increased  
176 contribution of the geopotential energy term overwhelming the moisture and internal energy  
177 terms in the moist static energy equation for the high altitude air. Net transport of energy,  
178 occurring in the upper branch of the Hadley cell from the SH to the NH, leads to increased  
179 moisture advection to the SH in the lower branch of the Hadley Cell. This redistribution of  
180 energy causes the ascending branch of the Hadley cell to migrate to the warmer SH where  
181 moisture convergence is increased and convective quasi-equilibrium is achieved under the  
182 relatively narrow poleward shifted ascending branch of the stronger SH winter Hadley Cell.  
183 This mechanism leads to the southward-displaced tropical rain belts (Broccoli et al., 2006).

184 This result is consistent with Lindzen and Hou (1988), who used a relatively simple  
185 model to show that even a small movement of maximum heating poleward into one hemisphere  
186 causes great asymmetry in the Hadley Cell, with the winter cell intensifying tremendously and  
187 the summer cell becoming rather modest. More recent work continues to elucidate the  
188 mechanism of extratropical forcing of the ITCZ (Kang et al. 2008). The ocean also plays a vital  
189 role in pushing the ITCZ into the warmer hemisphere (Xie and Philander, 1994).

190 GCM results confirm this mechanism and connect the changes due to northward  
191 displacement of the ITCZ with the onset of active periods in the Asian summer monsoon (Chao  
192 and Chen 2001). It is evident that a geoengineering technique that could preferentially cool the  
193 SH could shift the tropical rain bands northward. However, in a GCM there are clouds. How  
194 would clouds respond in the hemisphere cooled by geoengineering? Would clouds change in the  
195 area being directly cooled? Would a cooling of the subtropics either directly, or indirectly via  
196 eddy flux from the artificially cool high latitudes, cause an increase in subtropical subsidence?  
197 Would this increase in the sinking of air above the intensified subtropical highs cause water  
198 vapor to be trapped in the lower troposphere, forming low clouds and suppressing water vapor  
199 mixing into the free troposphere, where the water vapor may instead be used up in formation of  
200 high clouds, which tend to reduce outgoing longwave radiation? Informed by these established  
201 diagnostic mechanisms associated with the impacts of asymmetric heating of the hemispheres,  
202 we seek to concurrently cool the entire SH and the NH tropics, modestly cool the NH  
203 extratropics and, most importantly, induce an anomalous overturning circulation and redistribute  
204 rainfall from ocean to land and from south to north across the tropics.

## 205 **2. Methods**

### 206 **2.1 Design of experiment and model configuration**

207 Figure 1 shows the regions selected for albedo enhancement. These regions were chosen  
208 because of their low cloud fraction, low wind speeds, weak currents, and lack of biological  
209 productivity.

210 We used the Community Land Model (CLM) version 4.0 with prescribed satellite  
211 phenology (CLM4SP) instead of the version of CLM with a carbon–nitrogen cycle, coupled with  
212 CAM4–chem. Vegetation photosynthesis is calculated under the assumption of prescribed  
213 phenology and no explicit nutrient limitations (Bonan et al., 2011, Xia et al., 2016). Dynamic  
214 vegetation is not turned on in this study. The ocean model does not include any biogeochemical  
215 responses.

216 The fundamental question we wish to answer concerns representation of the physical  
217 processes that lead to realistic simulation tropical precipitation. The Asian monsoon is of great  
218 importance in that investigation. Fortunately, monsoon processes and regimes are depicted well  
219 in our atmospheric component, CAM4 (Meehl et al., 2012). Some important features of CAM4  
220 that illustrate its very good monsoon representation include the amount and location of

221 precipitation over the southern Tibetan Plateau and over the Western Ghats (a mountain range  
222 near the west coast of south India). This is improved when compared to earlier versions of the  
223 model. The rain shadow leeward of this range is often not resolved by GCMs, however CAM4  
224 shows some evidence of this rain shadow. These changes related to orography and horizontal  
225 resolution are important and likely generalize to similar land surface features outside of India,  
226 where model biases have not been as carefully studied as they have been in heavily populated  
227 southern India. This improvement can be attributed to the CCSM4 finite-volume dynamical  
228 core, which replaces the spectral version of the CCSM3 and the interconnected higher horizontal  
229 resolution (Neale et al., 2013). Additionally, large-scale features are improved. For example,  
230 the representation of the ITCZ during NH winter southward migration over the maritime  
231 continent is improved (Meehl et al., 2011).

232 There is an important process associated with monsoon precipitation, however, that may  
233 be imperfectly simulated across many CMIP5 GCMs. Zonal mean absorbed shortwave radiation  
234 is too high over the southern ocean (Kay et al., 2016). This cloud problem leads to a warmer  
235 Southern Ocean, which leads to anomalous SH atmospheric eddy flux to the subtropics from the  
236 extratropics, potentially damping the cooling response of our negative surface radiative forcing  
237 in the subtropical oceans. The effect of a transfer of heat from the SH extratropics into the  
238 Hadley Cell already causes a relatively weak negative bias in the amount of interhemispheric  
239 heat transport from the south to north. Therefore, the manifestation of this bias in G4Foam  
240 would be to partially offset our imposed cooling, lessening the need for interhemispheric energy  
241 transport to the SH and suppressing the surface return flow of moisture advection into the NH.  
242 Lower than observed interhemispheric energy transport would be associated with a weaker Asian  
243 monsoon. However, this feature is equally present in our G4Foam experiment and the  
244 comparison experiments G4SSA and RCP6.0, so is unlikely to appreciably affect the differences.

245 We compare G4Foam to two experiments. First is a specific sulfate injection scenario,  
246 G4 Specified Stratospheric Aerosol (G4SSA; Xia et al., 2016). They used a prescribed  
247 stratospheric aerosol distribution roughly analogous to annual tropical emission into the  
248 stratosphere (at 60 mb) of 8 Tg SO<sub>2</sub> yr<sup>-1</sup> from 2020 to 2070. This produces a radiative forcing of  
249 about -2.5 W m<sup>-2</sup>. The G4SSA forcing ramps down from 2069-2071 and then continues without  
250 additional forcing from 2072-2089. In G4SSA tropospheric aerosols are not affected by the  
251 prescribed stratospheric aerosols. Therefore we cannot evaluate how stratospheric aerosols  
252 would actually fall out and impact the chemistry, dynamics and thermodynamics of the  
253 troposphere from this experiment. Neely et al. (2015) offers more detail on the prescription of  
254 stratospheric aerosols in CAM4-Chem. The second simulation for comparison, which serves as  
255 the reference simulation, for both G4Foam and G4SSA is the Representative Concentration  
256 Pathway 6.0 (RCP6.0) (Meinshausen et al., 2011) from 2004 to 2089. We have run three  
257 ensemble members each for G4Foam, G4SSA, and RCP6.0.

## 258 **2.2 Ocean albedo enhancement approach**

259 A plausible technology now exists to make quantities of long lasting foam, or engineered  
260 microbubbles to enhance ocean albedo. . Ocean albedo modification gained attention when  
261 Seitz (2010) suggested that since air-water and air-sea interfaces are similarly refractive,  
262 dispersing microbubbles onto the surface of the ocean would reflect sunlight in much the same  
263 way as cloud droplets do. While engineering refractive or stable foams is commonly done and  
264 applied in both food science and firefighting, engineering a stable and refractive foam  
265 appropriate for a geoengineering scheme appeared fanciful until Aziz et al. (2014) produced a  
266 long lasting refractive foam made with biodegradable and non-toxic additives. Aziz et al.  
267 identified foam lifetime of three months or more per microbubble as lasting long enough that the  
268 input of energy to create the microbubbles would not be prohibitive. After experimenting with

269 protein-only solutions, Aziz et al. (2014) added high methyl ester pectin to type A gelatin and  
270 created a foam in salt water, which was still intact and stable at the cessation of the experiment  
271 after 3 months. The reflectance of the foam was about 50%, which is comparable to that of  
272 whitecaps. The creation of these stable microbubbles makes enhancing ocean albedo in this  
273 manner “feasible” (Aziz et al. 2014). However, there are a number of other potential risks  
274 associated with microbubble deployment, even if the feasibility issues are set aside. Robock  
275 (2011) pointed out that vertical mixing in the ocean, changes in ocean circulation, impacts on  
276 photosynthesis, and risks to the biosphere could all impair the efficacy of this geoengineering  
277 approach. Robock (2011) also pointed out that a cooler ocean would serve as a more effective  
278 CO<sub>2</sub> sink, helping to offset the CO<sub>2</sub> increase that comes about as a feedback of warming. Other  
279 potentially attractive attributes of this technique include the possibility that it could be deployed  
280 exclusively in the 20% of the world’s oceans that are not biologically active (Aziz et al. 2014)  
281 and therefore have little impact on the biosphere, and that there would be no risk to ozone in the  
282 stratosphere.

### 283 **3 Results**

284 The following results compare the G4Foam climate with the climates in G4SSA and  
285 RCP6.0 averaged over the period 2030-2069. While G4Foam and G4SSA forcing commences in  
286 2020, the first ten years of both experiments are a period of transition. For that reason 2020-  
287 2029 is discarded from our comparisons. We analyze mainly annual average and JJA results,  
288 since JJA is meteorological summer in the NH and using JJA facilitates comparison with  
289 G4SSA, which reports results in terms of JJA (Xia et al., 2016).

#### 290 **3.1 Temperature and cloud response**

291 The primary purpose of G4Foam is to assess the possibility of reducing global mean  
292 surface temperature without reducing monsoon precipitation. The G4Foam simulations reduce  
293 global mean surface temperature relative to RCP6.0 by 0.60 K and global mean land surface  
294 temperature by 0.51 K relative to RCP6.0. In JJA, G4Foam is 0.70 K cooler than RCP6.0 over  
295 land in the tropics, 20°S-20°N, during JJA (Table 1).

296 These temperature changes in G4Foam, relative to RCP6.0, result from an all-sky top-of-  
297 atmosphere forcing of -1.5 W m<sup>-2</sup> (global, year-round), and -1.9 W m<sup>-2</sup> in the tropics during JJA  
298 only (Figure 2). This JJA cooling in the tropics is of particular importance due to the dense  
299 population and heavy agricultural demand in the tropics, particularly north of the equator.

300 G4Foam does not achieve the same amount of cooling as G4SSA, which would reduce  
301 global mean surface temperature by 0.92 K. All-sky top-of-atmosphere shortwave flux in G4SSA  
302 is reduced by 2.7 W m<sup>-2</sup> as compared to RCP6.0. In terms of global mean clear-sky top-of-  
303 atmosphere shortwave flux, relative to RCP6.0, G4Foam applies only 38% of the forcing that is  
304 applied in G4SSA (Figure 3). The G4Foam forcing is more efficient in reducing temperature  
305 than G4SSA largely because there is an additional 1.1 W m<sup>-2</sup> of net cloud forcing in G4Foam  
306 relative to G4SSA (Figure 2b).

307 Figure 4 shows a comparison of the spatial distribution of surface temperature changes  
308 between G4Foam and G4SSA and between G4Foam and RCP6.0 between 2030-2069. Over the  
309 SH ocean gyres that were brightened (Fig. 1), we see a very robust cooling, reaching 2 K at the  
310 center of the South Pacific foamed region. However, the cooling mixes rather well throughout  
311 the SH. Cross equatorial flow and changes in the Hadley Cell transmit this cooling into the NH  
312 tropics through the mechanisms described in section 1.4, above. Some of this cooling in the NH  
313 tropics is then transmitted to the NH extratropics.

314 G4Foam is significantly cooler ( $p < 0.05$ ) than RCP6.0 in almost all locations south of  
315 30°N, in mid latitude NH continental regions windward of the Atlantic and Pacific, and at very  
316 high latitudes. Figure 4d shows that G4Foam is less effective in cooling extratropical NH land



317 regions during JJA. This is reasonable, since continental heating in the NH JJA season is more  
318 dominated by local heating than the other seasons, in which meridional energy transport plays a  
319 larger role. Figures 4a and 4c show that G4SSA is more effective over NH continents than  
320 G4Foam. A key weakness of G4Foam, if implemented alone, would be its failure to adequately  
321 reduce human suffering induced by heat stress in NH mid-latitudes during the summer as a result  
322 of ongoing global warming.

323 Since the G4Foam forcing alone, with the amplitude of the current experiments, would be  
324 insufficient to achieve any of the objectives of the G4Foam experiment, positive feedbacks that  
325 enhance cooling and circulation responses must be triggered by the G4Foam forcing to enhance a  
326 resulting cooler, wetter climate. Figure 5 shows change in low cloud fraction both year-round  
327 and in the JJA season. The largest change is in the northern half of the regions where foam is  
328 applied, and the area to the north of those foamed regions. The changes in low clouds in these  
329 regions are both large and statistically significant.

330 The low cloud fraction increase in the three areas to the north and northeast of the  
331 G4Foam-forced subtropical surface regions is likely due to a stronger than normal trade wind  
332 inversion (TWI). The inversion develops when warm air is trapped above the atmospheric  
333 mixed layer due to large-scale subsidence and surface mixing of cooler air above these relatively  
334 low SST regions. The increase in low cloud fraction does not occur over the entire downwind  
335 area because SSTs increase from east to west, causing a change in the lower troposphere from  
336 east to west. Moving west, the stratocumulus layer, which is trapped under the inversion base,  
337 decouples from the mixed layer in the lower troposphere. The surface warming triggers more  
338 turbulence within the planetary boundary layer, which allows for enhanced cumulus mixing in  
339 the cloud layer, which entrains dry air, and the marine stratocumulus layer evaporates.

340 The subtropical high-pressure systems are stronger in G4Foam, due to the stronger than  
341 normal Hadley Cell, which enhances subsidence throughout the subtropics. Typically, a  
342 subsidence inversion is strongest over the center of the subtropical anticyclones, over cold  
343 currents (particularly the Peru Current), and over cooler than normal waters, which are subjected  
344 to enhanced upwelling in large part by trade winds on the periphery of the subtropical highs  
345 (DeSzoeke et al., 2016). The TWI becomes weaker and its base increases in height with distance  
346 towards the west and towards the equator as SSTs increase. This pattern is particularly evident  
347 in the Pacific, due to the larger geographical extent of the forced area.

348 Specifically, under G4Foam conditions, the increased low cloud fraction areas are the  
349 result of the combination of enhanced large-scale subsidence (stronger Hadley cell) and a cooler  
350 than normal ocean surface. The cooler than normal surface waters are due to general cooling  
351 throughout the SH, as well as an increase in wind-driven upwelling over these areas of increased  
352 low cloud fraction, which are already prone to upwelling, large fraction of low clouds and high  
353 relative humidity.

354 In these areas north of the foamed areas, the subsidence inversion is not quite as strong as  
355 it is right under the subtropical high. However, SSTs are artificially low, due to general cooling  
356 of the hemisphere and enhanced upwelling, driven by anomalously strong winds, and mixing of  
357 this anomalously cool surface air within the planetary boundary layer keeps the lowest levels of  
358 the atmosphere cool, keeping the marine air inversion base above the lifting condensation level,  
359 allowing stratocumulus clouds to form at low altitude, below the base of the inversion.  
360 Additionally, since SST is lower than air temperature in the areas of enhanced low clouds, the  
361 surface inversion is further maintained as a result of sensible heat flux from the atmosphere to  
362 the ocean. Ultimately, the strong inversion often results in more marine layer cloud formation  
363 and longer times for the clouds to dissipate. This response is consistent through the 2030-2069  
364 period. This enhanced low-cloud fraction response is similar to the seasonal cycle of marine low

365 clouds around the periphery of the subtropical highs (Wood and Bretherton, 2004; Chiang and  
366 Bitz, 2005; Wood and Bretherton, 2006; George and Wood, 2010; Mechoso et al., 2014).

367 The relationship between the strength of the subtropical high, inversion strength and  
368 marine cloud prevalence can be elucidated by analogy to the behavior of the very well-observed  
369 marine low clouds off of the California coast. The strength of the inversion, and the prevalence  
370 of marine low clouds are modulated by the annual cycle with annual maximum low cloud extent  
371 in the summer, when the subtropical high is at its strongest. The increased low cloud fraction  
372 response is not seen above the actual G4Foam forced regions despite the cooler SST. The  
373 subsidence is so strong in these areas that the base of the inversion falls below the lifting  
374 condensation level, and few clouds form (Fig. 5).

375 Another striking G4Foam feature is the large and statistically significant increase in low  
376 clouds over land across central Africa, the Middle East and Southeast Asia. These low clouds  
377 are coincident with the large cooling in Africa and the Middle East, particularly during the JJA  
378 season relative to both G4SSA and RCP6.0 (Figs. 5c, 5d). These are very hot areas and heat  
379 related mortality and morbidity are of great concern. A similar increase in low clouds is evident  
380 in the tropical eastern Pacific. This is coincident with the mean northward displacement of the  
381 ITCZ in G4Foam with respect to G4SSA and RCP6.0, not with any changes in the El Niño-  
382 Southern Oscillation (ENSO).

383 In G4Foam, clouds are the key to changing the radiation budget in the tropics. In  
384 G4Foam there is a change in shortwave cloud forcing of  $-2.32 \text{ W m}^{-2}$  annually and  $-2.59 \text{ W m}^{-2}$   
385 during JJA, relative to G4SSA. Only very small increases in longwave cloud forcing of  $0.42 \text{ W m}^{-2}$   
386 annually, and  $0.07 \text{ W m}^{-2}$  in JJA counter this negative forcing. The overall change in cloud  
387 radiative forcing in the tropics is  $-1.90 \text{ W m}^{-2}$  annually and  $-2.52 \text{ W m}^{-2}$  during JJA. Relative to  
388 RCP6.0, in G4Foam there is a change in shortwave cloud forcing of  $-0.68 \text{ W m}^{-2}$  annually  
389 and  $-0.89 \text{ W m}^{-2}$  during JJA, relative to RCP6.0. Small increases in longwave cloud forcing of  
390  $0.40 \text{ W m}^{-2}$  annually, and  $0.28 \text{ W m}^{-2}$  in JJA counter part of this negative forcing. The overall  
391 change in cloud radiative forcing in G4Foam in the tropics is  $-0.49 \text{ W m}^{-2}$  annually and  $-0.61 \text{ W m}^{-2}$   
392 during JJA when compared to RCP6.0

393 Total cloud fraction is shown in Fig. 6. Figs. 6c and 6d are particularly striking in  
394 showing the increase in clouds over Africa and Southeast Asia during the JJA wet monsoon  
395 season in those regions. Under G4Foam, these regions generally experience cloudier and cooler  
396 summers relative to RCP6.0 and are cloudier and only very slightly warmer on average  
397 compared to G4SSA. Some parts of the Sahel and the Middle East are actually slightly cooler in  
398 G4Foam than RCP6.0. These changes in temperature and cloudiness play a key role in the  
399 changes in the hydrological cycle under G4Foam, which we discuss next.

### 400 **3.2 Hydrological Cycle Response**

401 Relative to G4SSA, precipitation in G4Foam over land in the tropics increases by 3.2%  
402 on an annual mean basis and by 3.9% during JJA (Table 1). Tropical precipitation in G4Foam  
403 over land in the tropics increases by 1.4% on an annual mean basis and by 2.02% during JJA,  
404 when compared to RCP6.0. Each of these changes is statistically significant ( $p < 0.05$ ).  
405 Regarding the temperature change relative to G4SSA, G4Foam is only about 0.3 K warmer in  
406 the tropics. Precipitation is expected to increase by between  $1.5\% \text{ K}^{-1}$  and  $3.0\% \text{ K}^{-1}$  as global  
407 mean temperature increases (Emori and Brown, 2005). The temperature difference between  
408 G4Foam and G4SSA can explain only a fraction of the precipitation increase. The statistically  
409 significant increase in land-only precipitation in the tropics in G4Foam relative to RCP6.0 occurs  
410 in a climate in which RCP6.0 is between 0.6 K and 0.7 K warmer than G4Foam, depending on  
411 the season. Over the tropical oceans, in G4Foam, precipitation is reduced by 0.4% on an annual

412 mean basis and reduced by 0.3% during JJA relative to G4SSA. There is a decrease of 2.6% on  
413 an annual mean basis and a decrease of 2.5% during JJA relative to RCP6.0.

414 Globally, over land, the precipitation response is similar to that in the tropics during JJA,  
415 but the magnitude of precipitation change is a bit less. Precipitation is statistically significantly  
416 increased over land in G4Foam relative to RCP6.0 by about 0.5%, despite G4Foam being cooler  
417 than RCP6.0. Precipitation is statistically significantly increased in G4Foam relative to G4SSA  
418 over land by 3.5%, despite G4Foam only being 0.3K warmer than G4SSA.

419 The overall global precipitation difference between G4Foam and G4SSA or RCP6.0  
420 when land and ocean are combined and all seasons and all latitudes are included is relatively  
421 small, and close to the 1.5% K<sup>-1</sup> to 3% K<sup>-1</sup> range of precipitation increase with temperature  
422 identified by Emori and Brown (2005). Globally, G4Foam is warmer than G4SSA by 0.3 K and  
423 there is 0.61% (2.1% K<sup>-1</sup>) more precipitation. G4Foam is cooler than RCP6.0 by 0.6 K and drier  
424 by 1.9% (3.1% K<sup>-1</sup>).

425 The spatial pattern of precipitation changes is shown in Fig. 7. Precipitation is greatly  
426 reduced over the ocean, particularly in the SH, relative to both G4SSA and RCP6.0. Changes in  
427 precipitation poleward of 40° latitude in either hemisphere are largely due to the temperature  
428 dependence of precipitation. The changes in the SH subtropics are dominated by the shortwave  
429 forcing applied over the ocean gyres, which reduces both evaporation and precipitation in those  
430 areas.

431 The changes in precipitation in the tropics are driven by a northward shift in the ITCZ.  
432 Large precipitation anomalies occur in a narrow band north of the equator and smaller positive  
433 anomalies occur in broader regions, primarily over NH monsoon regions. Importantly, we see a  
434 statistically significant increase in monsoon precipitation over the Sahel, the Middle East, the  
435 Indian subcontinent as well as southwest Asia and the maritime continent on an annual mean  
436 basis in G4Foam relative to G4SSA (Figure 7a). Relative to RCP6.0, these changes are not  
437 statistically significant over the Indian subcontinent or southwest Asia, but there are only very  
438 isolated and small areas in these regions in which there is any precipitation reduction, either on  
439 the annual mean or during JJA. Therefore, over much of heavily populated southern Asia, east  
440 of the Arabian Sea, G4Foam will be cooler than RCP6.0 without any notable mean precipitation  
441 differences. Most of these areas are expected to receive more rainfall as the planet warms. If  
442 this excess rainfall is not desirable in areas that are already wet, these results suggest that  
443 weakening the hydrological cycle would require that G4Foam would have to be combined with  
444 an additional geoengineering technique, such as stratospheric SRM.

445 Relative to both G4SSA and RCP6.0, there is a great deal more precipitation all year and  
446 particularly during JJA over central America, the northern Amazon, much of Africa, parts of the  
447 Arabian peninsula and the maritime continent. This response is more robust than the response  
448 over Southeast Asia due to the more direct dependence of rainfall in these regions on ITCZ  
449 position than in Southeast Asia, where the monsoon is also driven by numerous local and remote  
450 factors, including ENSO and the Indian Ocean Dipole.

451 Although these G4Foam simulations are enhance rainfall over many heavily populated  
452 and highly cultivated regions, particularly in the tropics, there are regions that would receive less  
453 precipitation and experience a decrease in P-E under this regime. Precipitation patterns for  
454 islands in the South Pacific are largely governed by the position and strength of the South Pacific  
455 Convergence Zone (SPCZ), which changes substantially under G4Foam due in part to the  
456 cooling and to the movement of gradients of temperature and pressure. Precipitation deficits  
457 over Madagascar and some regions in Africa and South America exceed 10%.

458 While the changes in precipitation are important and useful in describing the climate  
459 response in G4Foam, the change in precipitation minus evaporation between G4Foam and

460 G4SSA or RCP6.0 is more relevant to total available moisture. Figure 8 shows precipitation  
461 minus evaporation. Specifically Fig. 8a shows that precipitation minus evaporation in G4Foam  
462 is increased, and this increase is significant relative to G4SSA, across the Sahel, all of South  
463 Asia, the Maritime Continent, Central America and the northern Amazon. These are all heavily  
464 populated regions that are heavily cultivated. Figure 8b shows a similar pattern, albeit with the  
465 regions with significantly higher P-E is slightly suppressed in coverage, when G4Foam is  
466 compared to the warmer RCP6.0 rather than G4SSA. Figures 8c and 8d show changes in P-E  
467 during JJA, the NH wet monsoon season, when water is likely needed the most. Due to  
468 variability in the monsoon, there is more heterogeneity in the JJA response than the annual  
469 response, particularly across Southeast Asia. The P-E gain, driven by a combination of increased  
470 precipitation, lower temperature and increased cloudiness in these heavily cultivated regions,  
471 could be an important benefit of G4Foam. However, G4Foam increased precipitation to levels  
472 that exceed that simulated in RCP6.0.

473 Figure 9 shows the differences of annual cycles from 2030-2069 for zonal mean  
474 precipitation, zonal mean precipitation minus evaporation, and zonal mean precipitable water  
475 between G4Foam and G4SSA and between G4Foam and RCP6.0. They illustrate the northward  
476 displacement of the ITCZ, with positive precipitation anomalies progressing poleward as the  
477 boreal summer monsoon progresses. Figure 9f shows the difference in the zonal mean annual  
478 cycle for column integrated precipitable water between G4Foam and RCP6.0. The striking  
479 feature here is that zonal mean precipitation is higher at key latitudes in the tropics, despite zonal  
480 mean column integrated precipitable water being much lower at the same latitude.

481 In Fig. 10, we quantify the impacts on agriculture by looking at the photosynthesis rate  
482 anomalies between G4Foam and RCP6.0. There are small, but statistically significant increases,  
483 in photosynthesis rate in G4Foam relative to RCP6.0 in much of Southeast Asia. The most  
484 dramatic changes occur in Central America and parts of the northern Amazon, where the high  
485 CO<sub>2</sub>, relatively cool and very wet conditions promote agriculture.

#### 486 **4 Discussion**

487 This paper is an analysis of a geoengineering climate model experiment. Although for  
488 this experiment, global warming is reduced without seriously affecting precipitation, as was  
489 found in previous stratospheric aerosol implementations, this does not argue for the  
490 implementation of climate engineering. Any such decisions will need to balance all the risks and  
491 benefits of such implementation, and compare them to those from other possible responses to  
492 global warming.

#### 493 **4.1 Summary**

494 G4Foam would reduce global mean surface temperature relative to RCP6.0 by 0.6 K for  
495 the 40-year period starting 10 years after the implementation of geoengineering. Clear sky top of  
496 atmosphere net shortwave flux is reduced by 1.5 W m<sup>-2</sup> in G4Foam relative to RCP6.0. This is  
497 achieved primarily by the shortwave forcing over the subtropical SH ocean gyres. Before  
498 accounting for feedbacks, temperature is more sensitive to the forcing applied in G4Foam than  
499 G4SSA. However, global mean surface temperature in G4SSA 0.3 K lower than G4Foam  
500 because of a larger change in all-sky top of atmosphere net shortwave flux (Fig. 3).  
501 Additionally, the latitudinal distribution of temperature reduction is different in G4Foam than in  
502 G4SSA. G4SSA is most effective in cooling the NH continents, while G4Foam most effectively  
503 cools the surface south of around 30°N (Fig. 4).

504 Precipitation over land globally, in the tropics, during JJA globally, and during JJA in the  
505 tropics is statistically significantly increased in G4Foam relative to both G4SSA and RCP6.0  
506 (Fig. 7). The increase in precipitation in G4Foam relative to RCP6.0 is very likely undesirable in  
507 areas that already receive a lot of rainfall. The combination of cooling and increased

508 precipitation over land in the tropics results in a statistically significant increase in precipitation  
509 minus evaporation on an annual mean basis over Central America, the Northern Amazon, the  
510 Sahel, the Indian Subcontinent, the Maritime Continent and Southeast Asia in G4Foam relative  
511 to G4SSA (Fig. 8). All of these areas are very densely populated and heavily cultivated. Water  
512 scarcity is a major issue in many of these areas and G4Foam describes a climate model response  
513 in which there is global cooling, but higher P-E is modeled for many regions, some of which are  
514 in need of greater water supply. However, in order to assess actual changes in water supply, it  
515 would be necessary to analyze extreme events, as well as the economic and policy issues that  
516 ultimately determine the allocation of water resources in a given region.

517 Finally, both the changes in the spatial pattern and magnitude of changes in temperature  
518 and precipitation are far too large to be explained by the forcing alone. Instead, much of the  
519 temperature and hydrological response is the result of powerful cloud feedbacks and changes in  
520 the tropical meridional overturning circulation induced by the placement of the ocean albedo  
521 forcing.

#### 522 **4.2 The hydrological response**

523 The dominant cause of the G4Foam hydrological response is the intensification of the  
524 southern Hadley Cell and the northward migration of the ITCZ in response to the asymmetric  
525 forcing. However, the precipitation response is not zonally homogeneous, as the regional and  
526 local mechanisms are also important to the distribution of precipitation.

527 First, we address the increase in precipitation over Central America. For this, we turn to  
528 literature concerning the decline of Mayan civilization in Central America. Summer insolation  
529 in the NH began to decrease about 5,000 years ago. The ITCZ migrated southward. This  
530 southward shift caused rainfall to decrease in the crucial summer growing season. Long  
531 droughts and eventually water shortages contributed to the civilization's decline (Poore et al.,  
532 2004). In G4Foam, the ITCZ moves northward and the areas in which Mayan civilization  
533 flourished, including Belize, Guatemala and parts of Mexico, once again receive a great deal  
534 more precipitation. This response is strong and consistent in each ensemble member (Figs. 6-8).

535 The long mid-to-late 20<sup>th</sup> century Sahel drought was primarily caused by the ITCZ being  
536 pushed southward by preferential cooling of the NH (Folland, 1986). In G4Foam, the reverse is  
537 true. SH cooling pushes the ITCZ north, which generally explains the G4Foam precipitation  
538 increase in the Sahel.

539 A surprising finding is that portions of the Arabian Peninsula equatorward of 20°S  
540 experience precipitation increases of up to 1 mm day<sup>-1</sup> during the JJA season. However, this  
541 northward migration of boreal summer precipitation is evident in the paleoclimate record.  
542 Evidence of such precipitation is found in Fleitmann et al. (2003), who showed changes in  $\delta^{18}\text{O}$   
543 in cave stalagmites in Oman, which indicate increased rainfall in Oman under the influence of  
544 northward movement of the ITCZ over the Indian Ocean in periods of relative warmth in the NH  
545 relative to the SH.

546 Changes in precipitation over the Maritime Continent are partially attributable to large-  
547 scale convergence and rising air in those regions, as they lie longitudinally between G4Foam  
548 forcing zones where subsidence is enhanced. However, the Indian Ocean Dipole (IOD) (Cai et  
549 al., 2012; Chowadry et al., 2012) and Subtropical Indian Ocean Dipole (SIOD) phenomena  
550 discussed below are more likely the key drivers of the precipitation response over the Maritime  
551 continent.

552 In its positive phase, the SIOD features anomalously warm SSTs in the southwestern  
553 Indian Ocean, east and southeast of Madagascar, and cold anomalies of SST west of Australia.  
554 Stronger winds prevail along the eastern edge of the SH subtropical high over the Indian Ocean,  
555 which becomes intensified and shifted slightly to the south during positive SIOD events. This

556 results in more evaporation over the eastern Indian Ocean, which cools SSTs in the Indian Ocean  
557 east of Australia (Suzuki et al., 2004). In the SIOD negative phase, the opposite is true. There is  
558 cooler water in the southwest Indian Ocean, near Madagascar and warmer waters to the east,  
559 near Australia (Behera et al., 2001; Reason, 2001).

560 The negative phase of the SIOD features more precipitation in western Australia and the  
561 Maritime Continent. This negative SIOD phase is consistent with the SST pattern in the Indian  
562 Ocean forced by G4Foam. Therefore, the negative SIOD like mean state in G4Foam appears to  
563 play a role in the enhanced rainfall in Northwestern Australia and the Maritime Continent.

564 Based on both local and global changes in circulation, we expected a very large increase  
565 in the strength of the Indian Monsoon. In addition to the planetary scale changes associated with  
566 the ITCZ and the Hadley cell, the position of the semi-permanent high in the subtropical  
567 Southern Indian Ocean also plays a large role in modulating the Indian summer monsoon.  
568 Negative SIOD events during boreal winter are often followed by strong Indian summer  
569 monsoons. During a negative SIOD event, the subtropical high in the Indian Ocean shifts  
570 northeastward as the season shifts from December, January, and February to JJA. This causes a  
571 strengthening of the monsoon circulation, intensifying the Hadley Cell locally during the JJA  
572 monsoon.

573 A negative IOD is associated with a weakened Asian monsoon and an increase in  
574 precipitation over Australia and the Maritime Continent. In G4Foam, advection of cold water in  
575 the Somali current into the equatorial western Indian Ocean creates a negative IOD-like response  
576 that partially counters the combination of the global scale Hadley cell response and the forced  
577 SIOD, dampening the overall increase in the Indian monsoon. This warm west, cold east mean  
578 state in the equatorial Indian Ocean resembles a negative IOD mean state and it helps to explain  
579 the enhanced precipitation response in the Maritime Continent and the lower than expected  
580 increase in precipitation over the Indian subcontinent. The Asian monsoon and precipitation  
581 over the Maritime Continent are also governed in part by ENSO. However, no changes in ENSO  
582 were evident in G4Foam relative to G4SSA or RCP6.0. There is also no evident response of  
583 ENSO amplitude or frequency to any of several different regimes of stratospheric  
584 geoengineering (Gabriel and Robock, 2015).

#### 585 **4.3 Caveats**

586 The technology does not presently exist to actually deploy a stable, highly reflective layer  
587 of microbubbles on the actual ocean surface. While a stable, highly reflective, nondispersive  
588 foam has been developed in a saltwater solution, appropriate for climate engineering, this foam  
589 has not been tested outside the laboratory, much less on the surface of a large area of rarely  
590 quiescent ocean. The foam has not been immersed in a medium in which bacteria are present,  
591 and the interaction between the bacteria and the protein surfactant could damage the layer of  
592 microbubbles. Also, even though the diameter of these microbubbles is on the order of  $10^{-6}$  m,  
593 the demand for surfactant would likely overwhelm our current production capacity of whatever  
594 surfactant is chosen. The research on the engineering required to perform stratospheric  
595 geoengineering by sulfate injection is much further along than research of microbubble  
596 deployment, which is still in its earliest stages.

597 However, since development of microbubble technology is underway, it is worthwhile to  
598 determine how such a technology could be applied in a manner that would address serious  
599 climate issues. The progress being made in research associated with stratospheric  
600 geoengineering actually enhances the relevance of researching the climate impact of this  
601 particular ocean surface geoengineering approach as G4Foam was designed with an eye toward  
602 concurrent deployment with stratospheric geoengineering in the event the stratospheric

603 geoengineering were to cause the precipitation deficits that many model studies have shown that  
604 it might.

605 More fundamentally, the propriety of any attempt to impose a the G4Foam forcing in an  
606 attempt to achieve the modeled G4Foam climate is premised on a value judgment that it is  
607 desirable to develop a technology that could redistribute essential resources between nations in  
608 an attempt to achieve a net benefit to humanity as a collective when it unknowingly creates a  
609 local scarcity of these essential resources. To some extent, making this value judgment is  
610 germane and is a prerequisite to the discussion of any form of geoengineering. Even though  
611 G4Foam would be successful in increasing P-E in more heavily populated areas, P-E will almost  
612 certainly be reduced in remote regions, such as South Pacific islands. Is it ethical to pick  
613 winners and losers when the selection process is aimed at increasing the number of winners and  
614 decreasing the number of losers? Hypothetically, if G4Foam worked as described in this paper,  
615 from a purely consequentialist perspective, and with the sole objective being increased utility for  
616 the human collective, G4Foam could be considered beneficial.

617 Finally, this paper is concerned with the climate response to surface albedo changes. We  
618 do not examine how placing an actual layer of microbubbles in the ocean would change ocean  
619 circulation or impact chemistry and biology in the ocean. Evaluating the changes in the ocean,  
620 especially changes in its circulation that are caused by the surface albedo modification, is one of  
621 the next issues to explore. The ocean regions we propose to brighten have low biological  
622 productivity and weak currents, but the possibility of remote impacts, due to changes in  
623 circulation having negative impacts on important ocean regions, is worth considering.

#### 624 **4.4 Future research**

625 Whether or not a concurrent deployment of stratospheric geoengineering and ocean  
626 albedo modification could cool the entire planet while maintaining or enhancing the hydrological  
627 cycle, particularly in the tropics, is the next natural step in this research. Such research is  
628 motivated by the need to determine whether some combination of geoengineering techniques can  
629 be used to offset regional climate disparities that using one method of geoengineering alone  
630 could induce.

631

632

633 **Acknowledgments.** We thank two anonymous referees for their valuable comments, which  
634 improved this manuscript. This work is supported by U.S. National Science Foundation (NSF)  
635 grants AGS-1157525, GEO-1240507, and AGS-1617844. Computer simulations were  
636 conducted on the National Center for Atmospheric Research (NCAR) Yellowstone  
637 supercomputer. NCAR is funded by NSF. The CESM project is supported by NSF and the  
638 Office of Science (BER) of the U.S. Department of Energy. The Pacific Northwest National  
639 Laboratory is operated for the U.S. Department of Energy by Battelle Memorial Institute under  
640 contract DE-AC05-76RL01830.

641

## References

- 642  
643  
644 Aswathy, V. N., Boucher, O., Quaas, M., Niemeier, U., Muri, H., Mülmenstädt, J., and Quaas, J.:  
645 Climate extremes in multi-model simulations of stratospheric aerosol and marine cloud  
646 brightening climate engineering, *Atmos. Chem. Phys.*, 15, 9593-9610, doi:10.5194/acp-15-  
647 9593-2015, 2015.  
648  
649 Aziz, A., Hailes, H.C., Ward, J.M. and Evans, J.R.G.: Long-term stabilization reflective foams in  
650 seawater. *Royal Society of Chemistry*. 95, 53028–53036. 2014.  
651  
652 Behera, S. K. and Yamagata, T.: Subtropical SST dipole events in the southern Indian Ocean,  
653 *Geophysical Research Letters* 28: 327–330, 2001  
654  
655 Bonan, G. B., Lawrence, P. J., Oleson, K. W., Levis, S., Jung, M., Reichstein, M., Lawrence, D.  
656 M., and Swenson, S. C.: Improving canopy processes in the Community Land Model version  
657 4 (CLM4) using global flux fields empirically inferred from FLUXNET data, *J. Geophys.*  
658 *Res.*, 116, G02014, doi:10.1029/2010JG001593, 2011.  
659  
660 Broccoli, A. J., Dahl, K. A. and Stouffer, R.J.: The response of the ITCZ to Northern  
661 Hemisphere cooling. *Geophys. Res. Lett.*, 33, L01702, doi:10.1029/2005GL024546, 2006.  
662  
663 Cai W., Van Rensch P., Cowan T. and Hendon H.H.: Teleconnection pathways for ENSO and  
664 the IOD and the mechanism for impacts on Australian rainfall, *J. Climate*, 24:3910–3923,  
665 doi:10.1175/2011JCLI4129.1, 2011.  
666  
667 Chao, W.C. and Chen, B.: The origin of the monsoons, *J. Atmos. Sci.*, 58, 3497–3507. 2001.  
668  
669 Chiang, J. C. H. and Bitz, C. M. Influence of high latitude ice cover on the marine Intertropical  
670 Convergence Zone. *Climate Dynamics* 25, 477–496, 2005.  
671  
672 Chowdary J.S., Xie, S-P, Tokinaga, H., Okumura, Y.M., Kubota H., Johnson N. and Zheng X-  
673 T: Interdecadal variations in ENSO teleconnection to the Indo–western Pacific for 1870–  
674 2007, *J. Climate*, 25:1722–1744. doi:10.1175/JCLI-D-11-00070.1, 2012.  
675  
676 Crutzen, P.: Albedo enhancement by stratospheric sulfur injections: A contribution to solve a  
677 policy dilemma?, *Climatic Change*, 77, 211–219, 2006.  
678  
679 Cvijanovic, I., Caldeira, K., and MacMartin, D.G.: Impacts of ocean albedo alteration on Arctic  
680 sea ice restoration and Northern Hemisphere climate, *Environmental Research Letters*, 10,  
681 044020, doi:10.1088/1748-9326/10/4/044020, 2015.  
682  
683 DeSzoek, S.P., Verlinden, K.L., Yuter, S.E. and Mechem, D.B.: The Time Scales of Variability  
684 of Marine Low Clouds, *J. Climate.*, published online, <http://dx.doi.org/10.1175/JCLI-D-15-0460.1>, 2016.  
685  
686



687 Dykema J.A., Keith D.W., Anderson J.G., Weisenstein, D.: Stratospheric controlled perturbation  
688 experiment: a small-scale experiment to improve understanding of the risks of solar  
689 geoengineering, *Phil. Trans. R. Soc. A* 372, 20140059, doi:10.1098/rsta.2014.0059, 2014.  
690

691 Emori, S. and Brown, S.J.: Dynamic and thermodynamic changes in mean and extreme  
692 precipitation under changed climate, *Geophysical Research Letters*, 321,17,  
693 doi:10.1029/2005GL023272, 2005.  
694

695 Fleitmann, D., Burns, S.J., Mudelsee, M., Neff, U., Kramers, J., Mangini, A., Matter, A., 2003a.  
696 Holocene forcing of the Indian monsoon recorded in a stalagmite from Southern Oman,  
697 *Science*, 300, 1737–1739.  
698

699 Folland, C. K., Parker, D. E and Palmer, T. N.: Sahel rainfall and worldwide sea temperatures  
700 1901–85, *Nature*, 320, 602–607, 1986.  
701

702 Frierson, D. M. W. and Hwang, Y-T. Extratropical influence on ITCZ shifts in slab ocean  
703 simulation of global warming, *J. Clim.*, 25, 720–733, 2012.  
704

705 Gabriel, C. J. and Robock, A.: Stratospheric geoengineering impacts on El Niño/Southern  
706 Oscillation, *Atmos. Chem. Phys.*, 15, 11949-11966, doi:10.5194/acp-15-11949-2015, 2015.  
707

708 George, R. C. and Wood, R.: Subseasonal variability of low cloud radiative properties over the  
709 southeast Pacific Ocean, *Atmos. Chem. Phys.*, 10, 4047-4063, doi:10.5194/acp-10-4047-  
710 2010, 2010.  
711

712 Haywood, J. M., Jones, A., Bellouin, N. and Stephenson, D.: Asymmetric forcing from  
713 stratospheric aerosols impacts Sahelian rainfall, *Nat. Clim. Change*, 3(7), 660–665,  
714 doi:10.1038/nclimate1857, 2013.  
715

716 Held, I. M. and Soden, B. J.: Robust responses of the hydrological cycle to global warming, *J.*  
717 *Climate*, 19, 5686–5699, 2006.  
718

719 Hurley, J. V. and Boos, W. R.: Interannual variability of monsoon precipitation and local  
720 subcloud equivalent potential temperature. *J. Climate*, 26, 9507–9527, 2013.  
721

722 Hwang, Y.-T., Frierson, D. M. W. and Kang, S. M.: Anthropogenic sulfate aerosol and the  
723 southward shift of tropical precipitation in the late 20th century, *Geophys. Res. Lett.*, 40,  
724 doi:10.1002/grl.50502, 2013.  
725

726 IPCC: Summary for Policymakers, in: *Climate Change 2013: The Physical Science Basis.*  
727 *Contribution of Working Group I to the Fifth Assessment Report of the Intergovernmental*  
728 *Panel on Climate Change*, edited by: Stocker, T. F., Qin, D., Plattner, G.-K., Tignor, M.,  
729 Allen, S. K., Boschung, J., Nauels, A., Xia, Y., Bex, V., and Midgley, P. M., Cambridge  
730 University Press, Cambridge, UK and New York, NY, USA, 2013.  
731

732 Irvine, P. J., Ridgwell, A. and Lunt, D. J.: Climatic effects of surface albedo geoengineering, *J.*  
733 *Geophys. Res.*, 116, D24112, doi:10.1029/2011JD016281, 2011.  
734

735 Kang, S. M., Held, I. M., Frierson, D. M. W and Zhao, M.: The response of the ITCZ to  
736 extratropical thermal forcing: Idealized slab-ocean experiments with a GCM, *J.*  
737 *Climate*, 21, 3521–3532, 2008.

738

739 Keith, D. W., Duren, R. and MacMartin, D.G.: Field experiments on solar geoengineering: report  
740 of a workshop exploring a representative research portfolio. *Philosophical Transactions of*  
741 *the Royal Society A.*, 372-20140175, 2014.

742

743 Kravitz, B., Robock, A., Boucher, O., Schmidt, H., Taylor, K., Stenchikov, G. and Schulz, M.:  
744 The geoengineering model intercomparison project (GeoMIP), *Atm. Sci. Lett.*, 12, 162-167,  
745 doi: 10.1002/asl.316. 201, 2011.

746

747 Kravitz, B., Robock, A., Tilmes, S., Boucher, O., English, J. M., Irvine, P. J., Jones, A.,  
748 Lawrence, M. G., MacCracken, M., Muri, H., Moore, J. C., Niemeier, U., Phipps, S. J.,  
749 Sillmann, J., Storelvmo, T., Wang, H., and Watanabe, S.: The Geoengineering Model  
750 Intercomparison Project Phase 6 (GeoMIP6): simulation design and preliminary results,  
751 *Geosci. Model Dev. Discuss.*, 8, 4697–4736, doi:10.5194/gmdd-8-4697-2015, 2015.

752

753 Jones A., Haywood, J. and Boucher, O.: Climate impacts of geoengineering marine  
754 stratocumulus clouds, *J. Geophys. Res.*, 114, D10106, doi:10.1029/2008JD011450, 2009.

755

756 Kay J. E., Wall C., Yettella V., Medeiros B., Hannay C., Caldwell P. and Bitz C.: Global  
757 climate impacts of fixing the Southern Ocean shortwave radiation bias in the community  
758 earth system model (CESM), *J. Climate*, doi:10.1175/JCLI-D-15-0358, 2016.

759

760 Kharin, V. V., Zwiers, F. W., Zhang, X., and Hegerl, G. C.: Changes in temperature and  
761 precipitation extremes in the IPCC ensemble of Global Coupled Model Simulations, *J.*  
762 *Climate*, 20, 1419– 1444, doi:10.1175/JCLI4066.1, 2007.

763

764 Lamarque, J.-F., Emmons, L. K., Hess, P. G., Kinnison, D. E., Tilmes, S., Vitt, F., Heald, C. L.,  
765 Holland, E. A., Lauritzen, P. H., Neu, J., Orlando, J. J., Rasch, P. J., and Tyndall, G. K.:  
766 CAM-chem: description and evaluation of interactive atmospheric chemistry in the  
767 Community Earth System Model, *Geosci. Model Dev.*, 5, 369–411, doi:10.5194/gmd-5-369-  
768 2012, 2012.

769

770 Latham, J., Bower, K., Choulaton, T., Coe, H., Connoly, P., Cooper, G., Craft, T., Foster, J.,  
771 Gadian, A., Galbraith, L., Iacovides, H., Johnston, D., Launder, B., Leslie, B., Meyer, J.,  
772 Neukermans, A., Ormond, B., Parkes, B., Rasch, P., Rush, J., Salter, S., Stevenson, T.,  
773 Wang, H., Wang, Q., and Wood, R.: Marine cloud brightening, *Phil. Trans. R. Soc. A*, 370,  
774 4217–4262, doi:10.1098/rsta.2012.0086, 2012.

775

776 Manabe, S. and Stouffer, R. J.: Sensitivity of a global climate model to an increase of CO<sub>2</sub>  
777 concentration in the atmosphere. *J. Geophys. Res.* 85, 5529–5554, 1980.

778

779 Mechoso, C., Wood, R., Weller, R., Bretherton, C. S., Clarke, A., Coe, H., Fairall, C., Farrar, J.  
780 T., Feingold, G. and Garreaud, R.: Ocean-cloud-atmosphere-land interactions in the  
781 southeastern Pacific: The VOCALS Program, *Bull. Amer. Meteor. Soc.*, 95, 357-375, 2014.

782

783 Meehl, G. A., Arblaster, J. M., Caron, J. M., Annamalai, H., Jochum, M., Chakraborty, A., and  
784 Murtugudde, R.: Monsoon regimes and processes in CCSM4. Part I: The Asian-Australian  
785 Monsoon, *J. Climate*, 25, 2583–2608, 2012.  
786

787 Meinshausen, M., Smith, S. J., Calvin, K., Daniel, J. S., Kainuma, M. L. T., Lamarque, J.-F.,  
788 Matsumoto, K., Montzka, S. A., Raper, S. C. B., Riahi, K., Thomason, A., Velders, G. J. M.,  
789 and van Vuuren, D. P. P.: The RCP greenhouse gas concentrations and their extension from  
790 1765 to 2300, *Climatic Change*, 109, 213– 241, doi:10.1007/s10584-011-0156-z, 2011.  
791

792 Neale, R., Richter, J., Park, S., Lauritzen, P., Vavrus, S., Rasch, P. and Zhang, M.: The mean  
793 climate of the Community Atmosphere Model (CAM4) in forced SST and fully coupled  
794 experiments, *J. Climate*, 26, 5150–5168, 2013.  
795

796 Neely III, R. R., Conley, A. J., Vitt, F., and Lamarque, J.-F.: A consistent prescription of  
797 stratospheric aerosol for both radiation and chemistry in the Community Earth System Model  
798 (CESM1), *Geosci. Model Dev.*, 9, 2459-2470, doi:10.5194/gmd-9-2459, 2016.  
799

800 Poore, R. Z., Quinn, T.M. and Verardo, S.: Century-scale movement of the Atlantic Intertropical  
801 Convergence Zone linked to solar variability, *Geophys. Res. Lett.*, 31, L12214, doi:  
802 10.1029/2004GL019940, 2004.  
803

804 Rasch P. J., Latham, J. and Chen, C.C.: Geoengineering by cloud seeding: influence on sea ice  
805 and climate system, *Environmental Research Letters*, 4, 45-112. doi:10.1088/1748-  
806 9326/4/4/045112, 2009.  
807

808 Reason, C. J. C.: Subtropical Indian Ocean SST dipole events and southern African rainfall,  
809 *Geophys. Res. Lett.*, 28, 2225-2228, 10.1029/2000GL012735, 2001.  
810

811 Robock, A.: 20 reasons why geoengineering may be a bad idea, *Bull. Atomic Sci.*, 64, 14–18,  
812 doi:10.2968/064002006, 2008.  
813

814 Robock, A.: Bubble, bubble, toil and trouble. An editorial comment. *Climatic Change*, 105, 383-  
815 385, doi:10.1007/s10584-010-0017-1, 2011.  
816

817 Robock, A.: Stratospheric aerosol geoengineering, *Issues Env. Sci. Tech.* (special issue  
818 “Geoengineering of the Climate System”), 38, 162-185, 2014.  
819

820 Robock, A.: Albedo enhancement by stratospheric sulfur injection: More research needed.  
821 *Earth’s Future*, doi:10.1002/2016EF000407, 2016.  
822

823 Sanderson B.M., O’Neill B., Tebaldi C.: What would it take to achieve the Paris temperature  
824 targets? *Geophys Res Lett*, 1, 10., doi:10.1002/2016GL069563, 2016.  
825

826 Seitz, R.: Bright water: hydrosols, water conservation and climate change. *Climatic Change*,  
827 105, 365–381, 2010.  
828

829 Siegenthaler, U., Stocker, T. F., Monnin, E., Luthi, D., Schwander J., Stauffer, B., Raynaud, D.,  
830 Barnola, J. M., Fischer, H., Masson, Delmotte, V., and Jouzel, J.: Stable carbon cycle-climate  
831 relationship during the late Pleistocene, *Science*, 310, 1313–1317, 2005.  
832

833 Suzuki, R., Behera, S.K., Iizuka, S. and Yamagata, T.: The Indian Ocean subtropical dipole  
834 simulated using a CGCM, *J. Geo. Res.* 109, doi:10.1029/2003JC001974, 2004.  
835

836 Taylor, K. E., Stouffer, R. J., and Meehl, G. A.: An overview of CMIP5 and the experiment  
837 design, *B. Am. Meteorol. Soc.*, 93, 485–498, doi:10.1175/BAMS-D-11-00094.1, 2012.  
838

839 Tilmes, S., Fasullo, J., Lamarque, J.-F., Marsh, D. R., Mills, M., Alterskjaer, K., Muri, H.,  
840 Kristjánsson, J. E., Boucher, O., Schulz, M., Cole, J. N. S., Curry, C. L., Jones, A., Haywood,  
841 J., Irvine, P. J., Ji, D., Moore, J. C., Karam, D. B., Kravitz, B., Rasch, P. J., Singh, B., Yoon,  
842 J.-H., Niemeier, U., Schmidt, H., Robock, A., Yang, S., and Watanabe, S.: The hydrological  
843 impact of geoengineering in the Geoengineering Model Intercomparison Project (GeoMIP),  
844 *J. Geophys. Res.-Atmos*, 118, 11036–11058, doi:10.1002/jgrd.50868, 2013.  
845

846 Tilmes, S., Mills, M. J., Niemeier, U., Schmidt, H., Robock, A., Kravitz, B., Lamarque, J.-F.,  
847 Pitari, G., and English, J. M.: A new Geoengineering Model Intercomparison Project  
848 (GeoMIP) experiment designed for climate and chemistry models, *Geosci. Model Dev.*, 8,  
849 43-49, doi:10.5194/gmd-8-43-2015, 2015.  
850

851 Tilmes, S., Lamarque, J.-F., Emmons, L. K., Kinnison, D. E., Marsh, D., Garcia, R. R., Smith, A.  
852 K., Neely, R. R., Conley, A., Vitt, F., Val Martin, M., Tanimoto, H., Simpson, I., Blake, D.  
853 R., and Blake, N.: Representation of the Community Earth System Model (CESM1) CAM4-  
854 chem within the Chemistry-Climate Model Initiative (CCMI), *Geosci. Model Dev.*, 9, 1853-  
855 1890, doi:10.5194/gmd-9-1853-2016, 2016.  
856

857 Trenberth, K. E., and Dai, A.: Effects of Mount Pinatubo volcanic eruption on the hydrological  
858 cycle as an analog of geoengineering, *Geophys. Res. Lett.*, 34, L15702,  
859 doi:10.1029/2007GL030524, 2007.  
860

861 Wood, R. and Bretherton, C. S.: Boundary layer depth, entrainment, and decoupling in the cloud-  
862 capped subtropical and tropical marine boundary layer, *J. Climate*, 17, 3576–3588, 2004.  
863

864 Wood, R. and Bretherton, C. S.: On the relationship between stratiform low cloud cover and  
865 lower-tropospheric stability, *J. Climate*, 19, 6425–6432, 2006.  
866

867 Xia, L., Robock, A., Tilmes, S., and Neely III, R. R.: Stratospheric sulfate geoengineering could  
868 enhance the terrestrial photosynthesis rate, *Atmos. Chem. Phys.*, 16, 1479-1489,  
869 doi:10.5194/acp-16-1479-2016, 2016.  
870

871 Xie, S-P. and Philander, S. G. H., A coupled ocean-atmosphere model of relevance to the ITCZ  
872 in the eastern Pacific, *Tellus*, 46A, 340–350, 1994.  
873

874 **Table 1.** Changes in temperature and precipitation in G4Foam relative to both G4SSA and  
875 RCP6.0, for the entire globe and for the Tropics (20°S-20°N) annually and in Northern  
876 Hemisphere summer, for the 40-year period beginning 10 years after the start of climate  
877 engineering.  
878

| <b>Global, 2030-2069</b>                     | <b>G4Foam – G4SSA<br/>(% change)</b> | <b>G4Foam – RCP6.0<br/>(% change)</b> |
|----------------------------------------------|--------------------------------------|---------------------------------------|
| Precipitation (mm/day)                       | +0.02 (+0.61)                        | -0.06 (-1.98)                         |
| Land precipitation (mm/day)                  | +0.07 (+3.19)                        | +0.01 (+0.32)                         |
| Ocean precipitation (mm/day)                 | -0.01 (-0.36)                        | -0.08 (-2.57)                         |
| Temperature (K)                              | +0.27                                | -0.53                                 |
| Land temperature (K)                         | +0.63                                | -0.44                                 |
| <b>Global, 2030-2069, June-July-August</b>   |                                      |                                       |
| Precipitation (mm/day)                       | +0.02 (+0.70)                        | -0.05 (-1.85)                         |
| Land precipitation (mm/day)                  | +0.08 (+3.35)                        | +0.02 (+0.70)                         |
| Ocean precipitation (mm/day)                 | +0.01 (-0.29)                        | -0.08 (-2.51)                         |
| Temperature (K)                              | +0.32                                | -0.60                                 |
| Land temperature (K)                         | +0.71                                | -0.53                                 |
| <b>Tropical, 2030-2069</b>                   |                                      |                                       |
| Precipitation (mm/day)                       | +0.06 (+1.59)                        | -0.03 (-1.06)                         |
| Land precipitation (mm/day)                  | +0.16 (+3.93)                        | +0.07 (+1.43)                         |
| Ocean precipitation (mm/day)                 | +0.03 (+0.77)                        | -0.07 (-1.92)                         |
| Temperature (K)                              | +0.21                                | -0.60                                 |
| Land temperature (K)                         | +0.43                                | -0.61                                 |
| <b>Tropical, 2030-2069, June-July-August</b> |                                      |                                       |
| Precipitation (mm/day)                       | +0.06 (+1.52)                        | -0.03 (-0.84)                         |
| Land precipitation (mm/day)                  | +0.16 (+4.66)                        | +0.07 (+2.02)                         |
| Ocean precipitation (mm/day)                 | +0.03 (+0.67)                        | -0.06 (-1.61)                         |
| Temperature (K)                              | +0.18                                | -0.61                                 |
| Land temperature (K)                         | +0.37                                | -0.70                                 |

879

CESM-CAM4-CHEM Control 10m wind (m/s)  
 shaded, sea level pressure (hPa) contours  
 2005-2019. Boxes bound foamed regions.

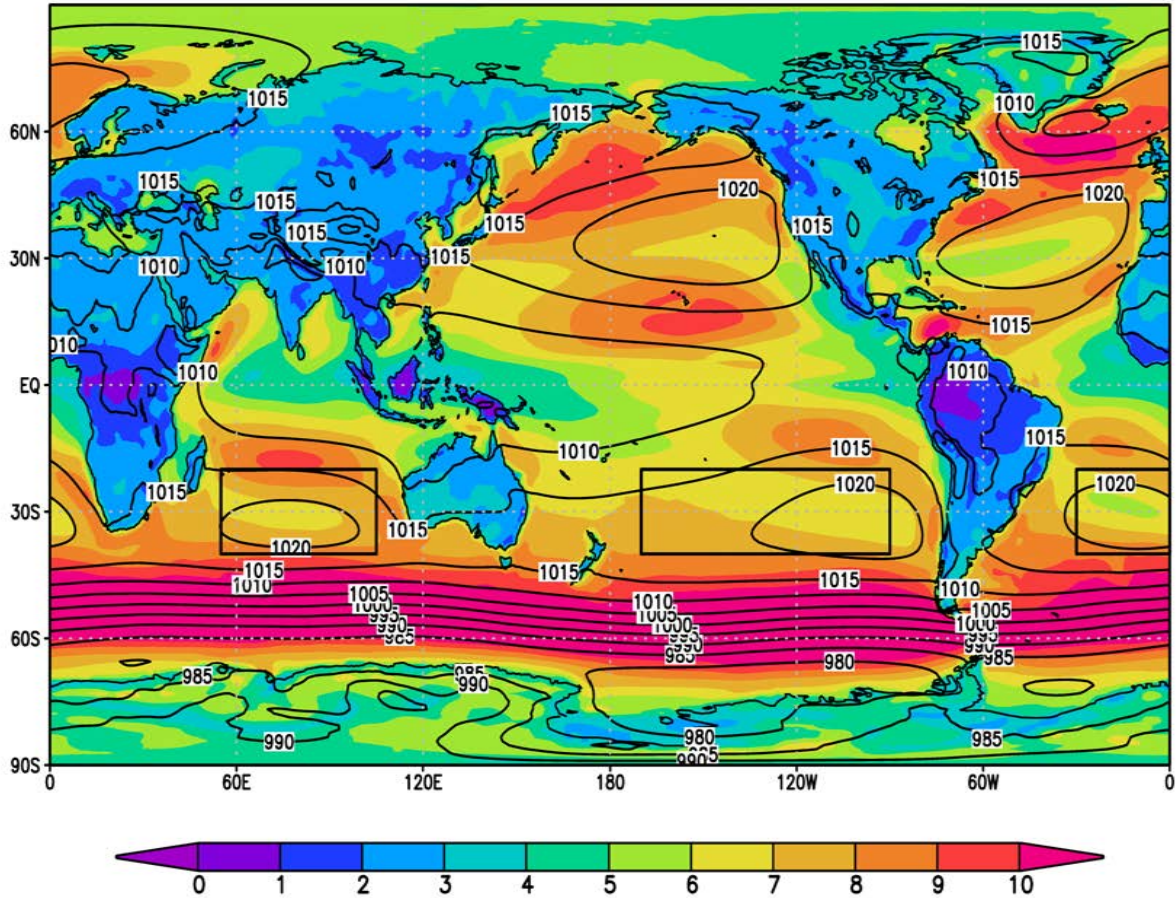

880  
 881 **Figure 1.** Applied forcing and global mean temperature response. Ocean albedo changed from  
 882 a daily average of 0.06, which includes a very small daily cycle, to a fixed value of 0.15 with no  
 883 daily cycle, over “foam regions,” 20°N-20°S, 90°W-170°W (South Pacific), 20°N-20°S, 30°W-  
 884 0°E (South Atlantic) and 20°N-20°S, 55°E-105°E (South Indian). Each foamed region is  
 885 outlined in black. Control run sea level pressure (mb) is shown with contours and 10-m winds  
 886 (m/s) are shaded.  
 887

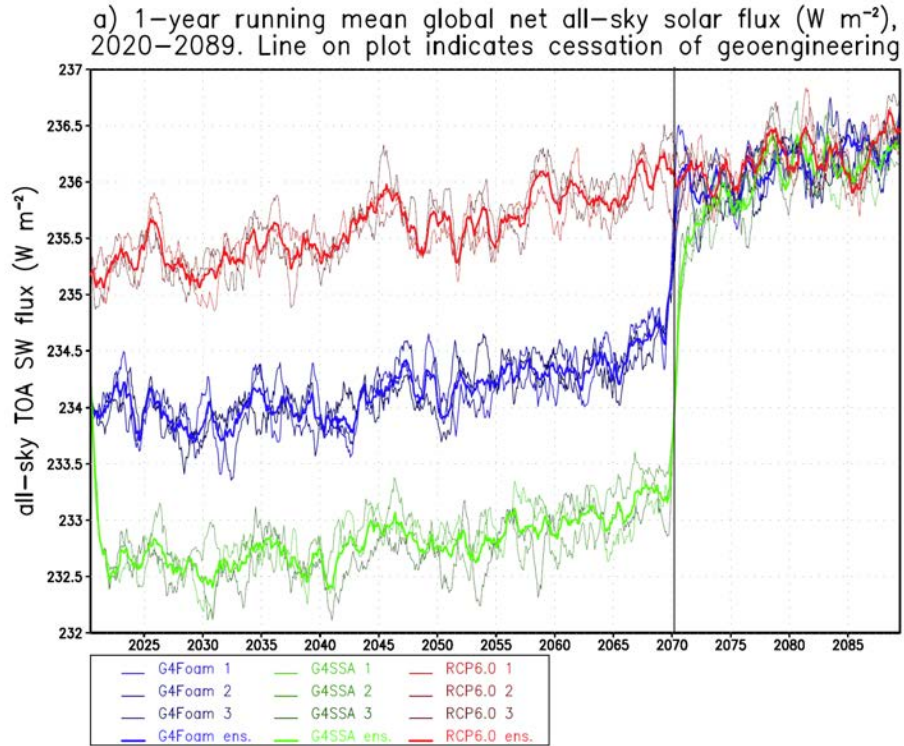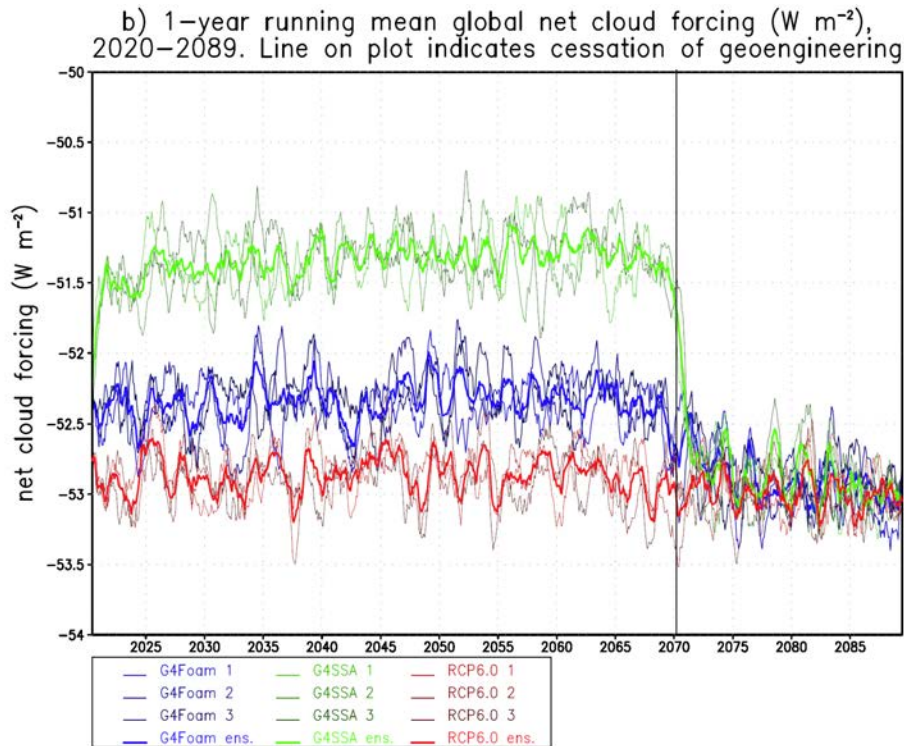

888  
889

890  
891  
892  
893  
894  
895

**Figure 2.** a) Net all-sky SW flux at top-of-atmosphere and (b) Time series of global mean net cloud forcing. Each ensemble member and the ensemble mean are shown for each forcing.

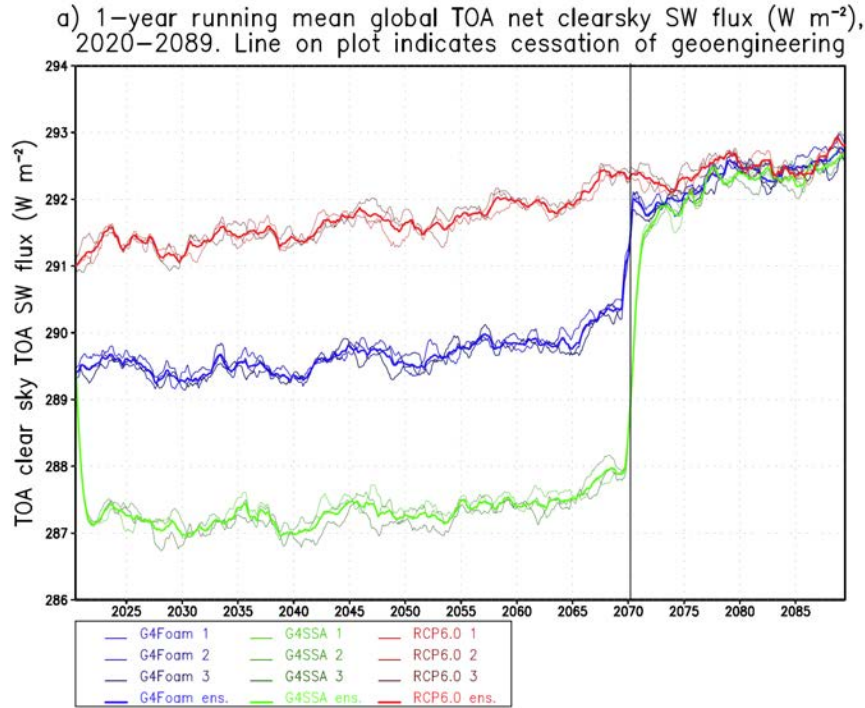

896  
897

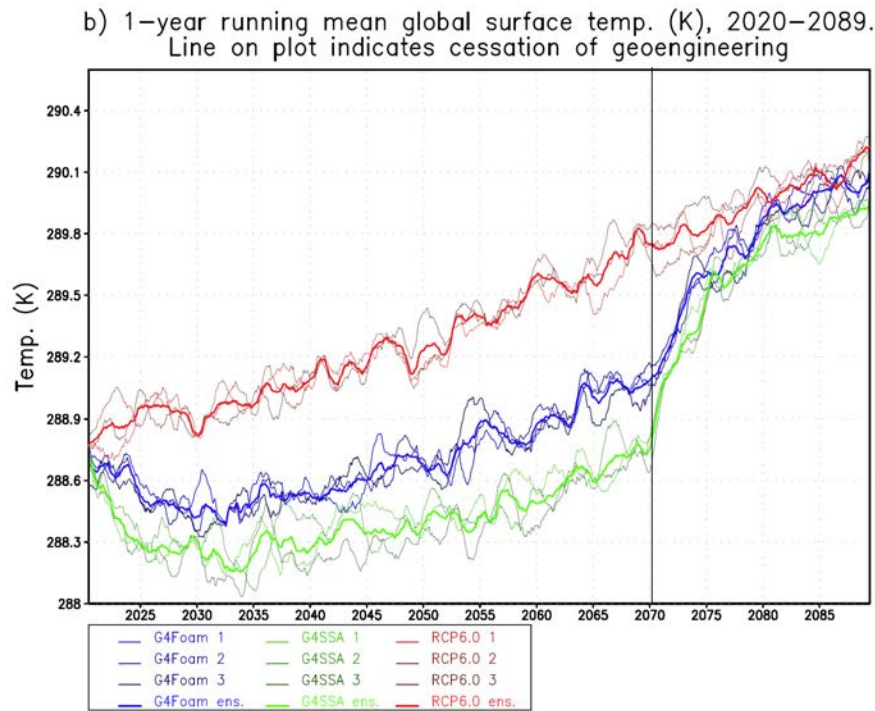

898  
899

900 **Figure 3.** (a) Net clear sky SW flux at top of atmosphere, which includes the effects of changes  
 901 in radiation caused by changes in ocean surface albedo or land albedo (ice and snow), as well as  
 902 stratospheric aerosols (stratospheric geoengineering) and (b) Time series of global mean  
 903 temperature. In G4Foam, temperature is more than twice as sensitive to ocean albedo forcing as  
 904 it is to stratospheric geoengineering, as applied in G4SSA, albeit with very different latitudinal  
 905 distributions of temperature changes. Each ensemble member and the ensemble mean are shown  
 906 for each forcing.



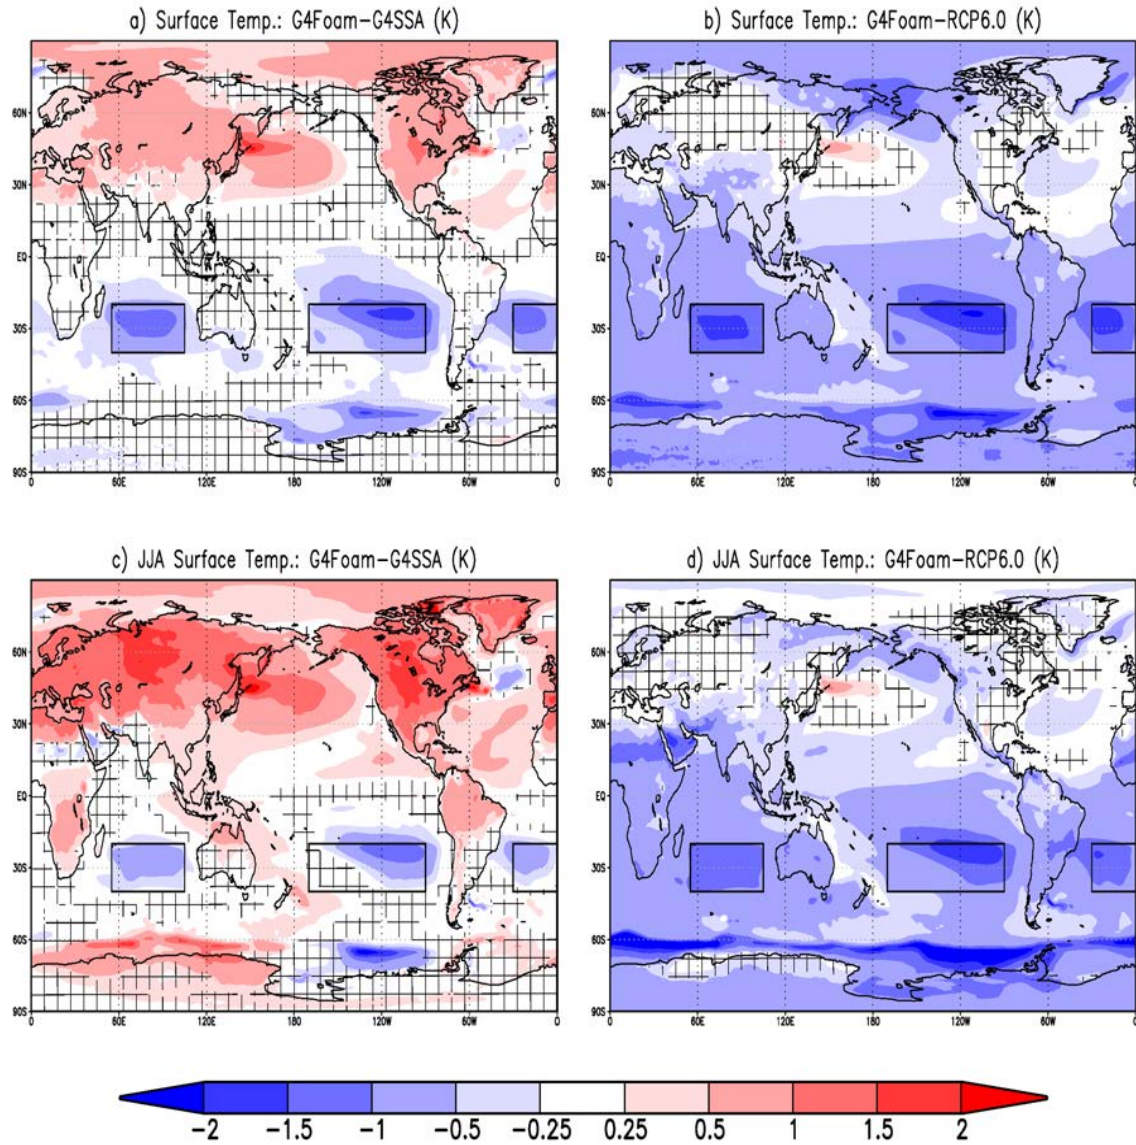

907  
 908  
 909  
 910  
 911  
 912  
 913

**Figure 4.** 2030-2069 surface temperature differences (K) between G4Foam and (a) G4SSA, (b) RCP6.0, (c) G4SSA during JJA, and (d) RCP6.0 during JJA. Hatched regions are areas with  $p > 0.05$  (where changes are not statistically significant based on a paired  $t$ -test). Black boxes enclose foamed regions.

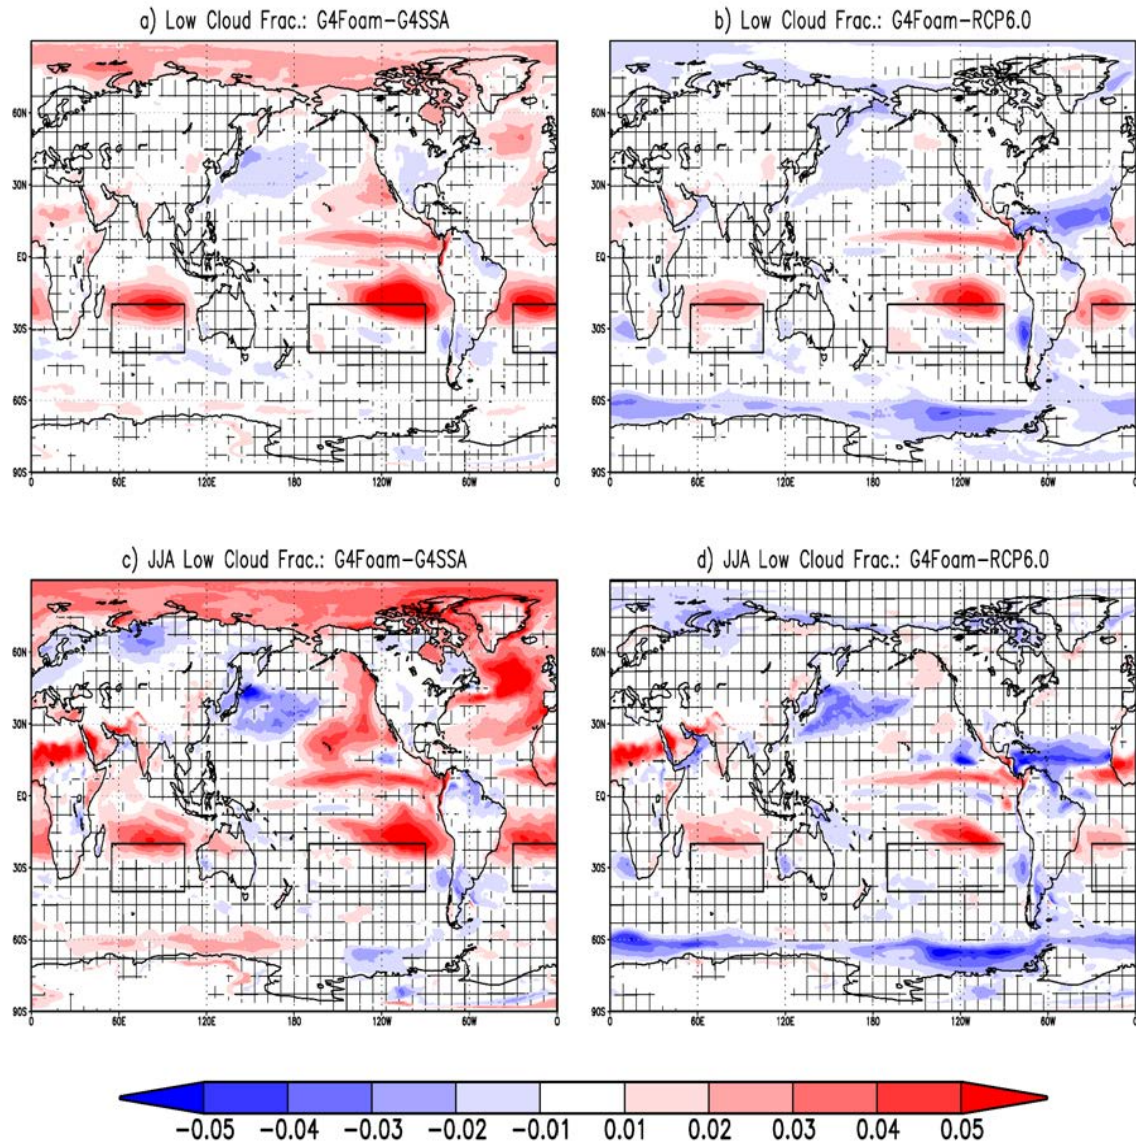

914  
 915  
 916  
 917  
 918  
 919  
 920  
 921  
 922

**Figure 5.** 2030-2069 low cloud fraction difference (unitless) between G4Foam and (a) G4SSA, (b) RCP6.0, (c) G4SSA during JJA, and (d) RCP6.0 during JJA. Hatched regions are areas with  $p > 0.05$  (where changes are not statistically significant based on a paired  $t$ -test). Black boxes enclose foamed regions.

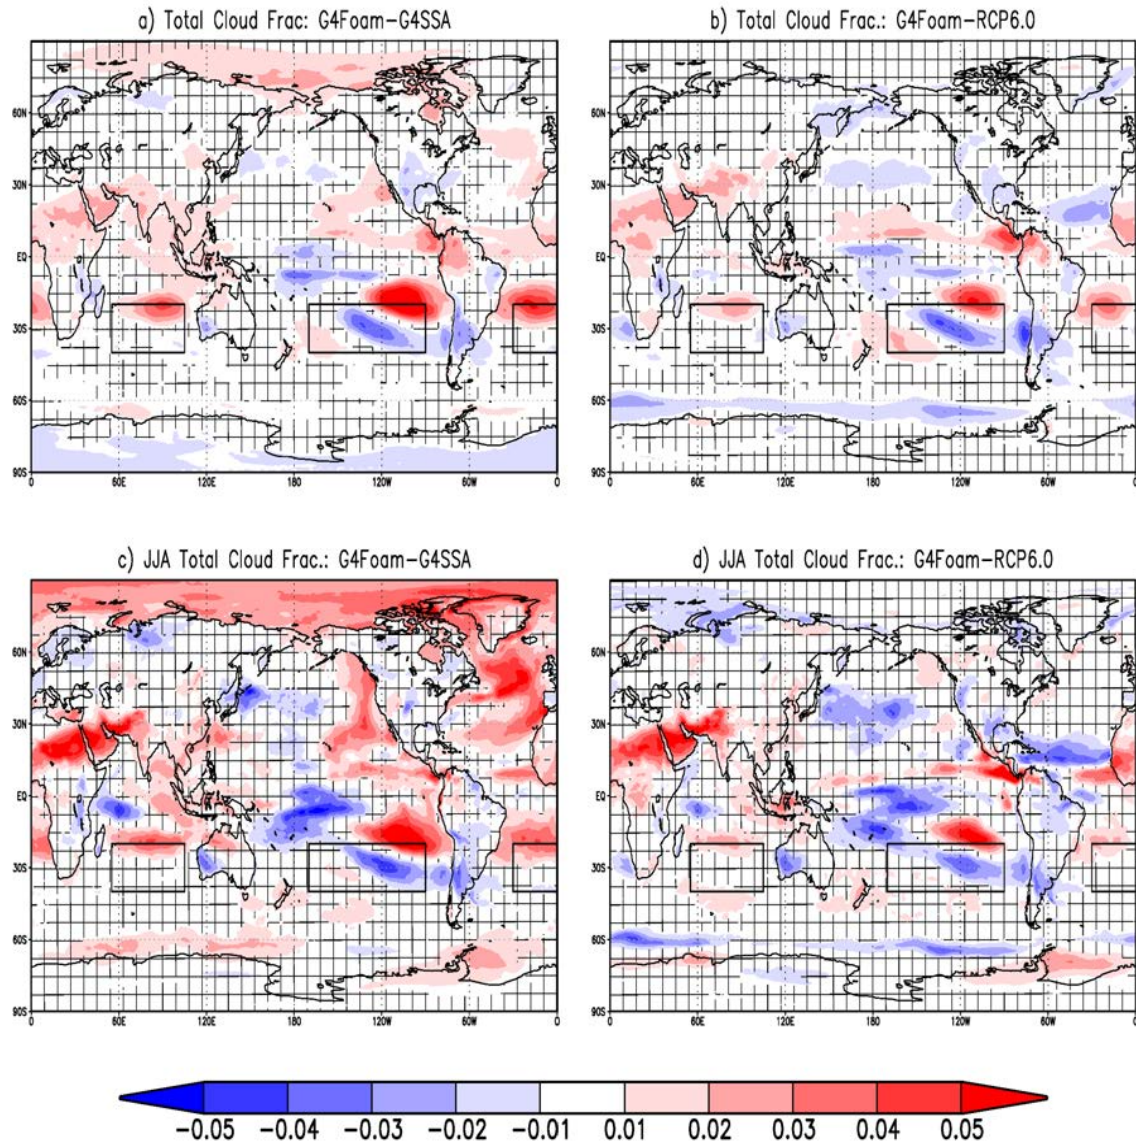

923  
 924  
 925  
 926  
 927  
 928  
 929  
 930

**Figure 6.** 2030-2069 total cloud fraction difference (unitless) between G4Foam and (a) G4SSA, (b) RCP6.0, (c) G4SSA during JJA and (d) RCP6.0 during JJA. Hatched regions are areas with  $p > 0.05$  (where changes are not statistically significant based on a paired  $t$ -test). Black boxes enclose foamed regions.

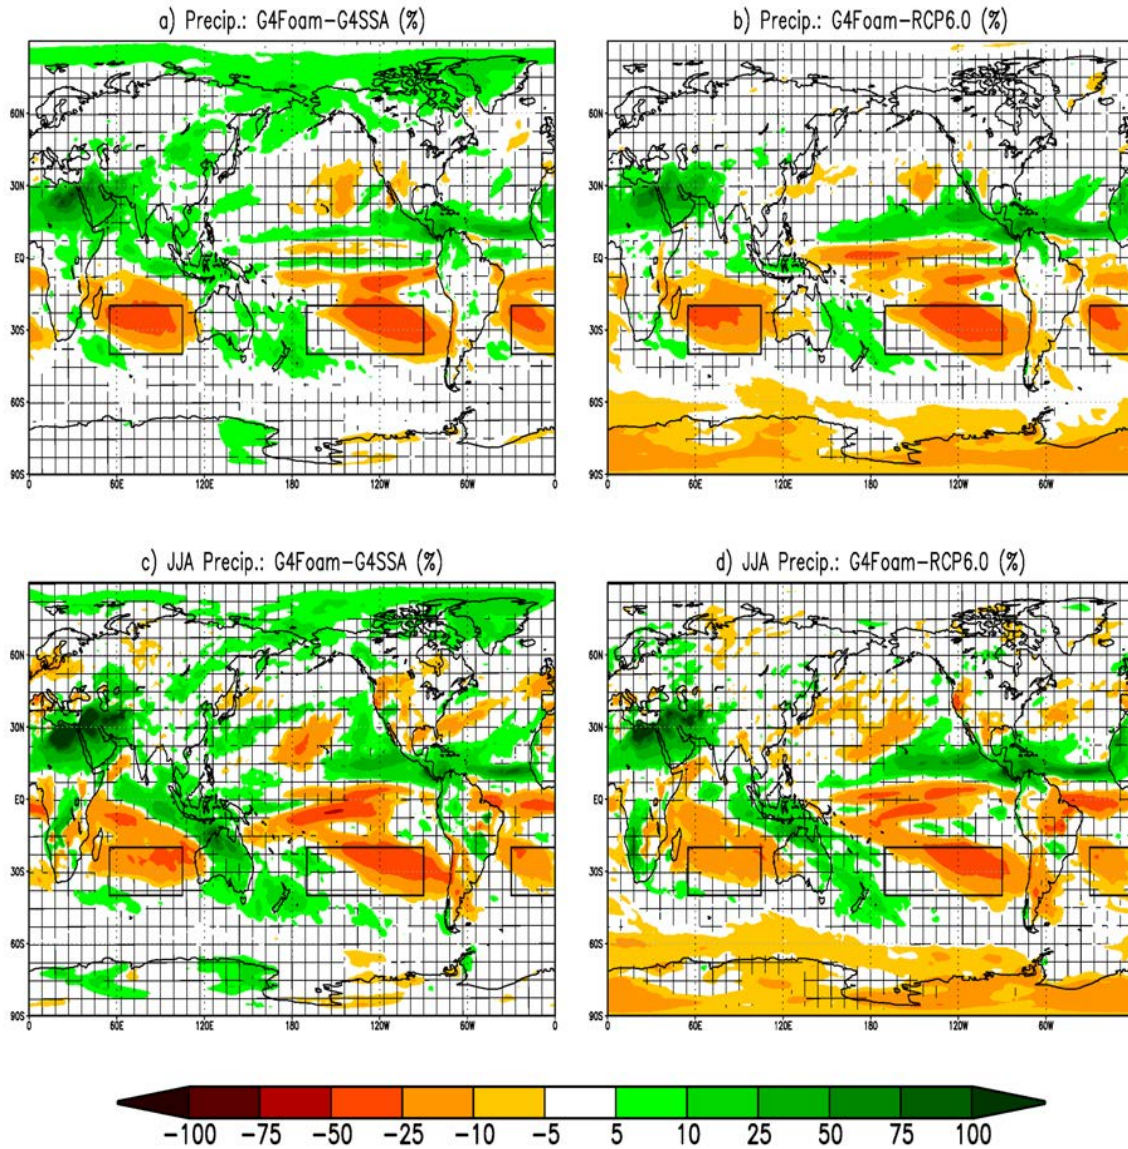

931  
 932  
 933  
 934  
 935  
 936  
 937  
 938

**Figure 7.** 2030-2069 precipitation difference (%) between G4Foam and (a) G4SSA, (b) RCP6.0, (c) G4SSA during JJA and (d) RCP6.0 during JJA. Hatched regions are areas with  $p > 0.05$  (where changes are not statistically significant based on a paired  $t$ -test). Black boxes enclose foamed regions.

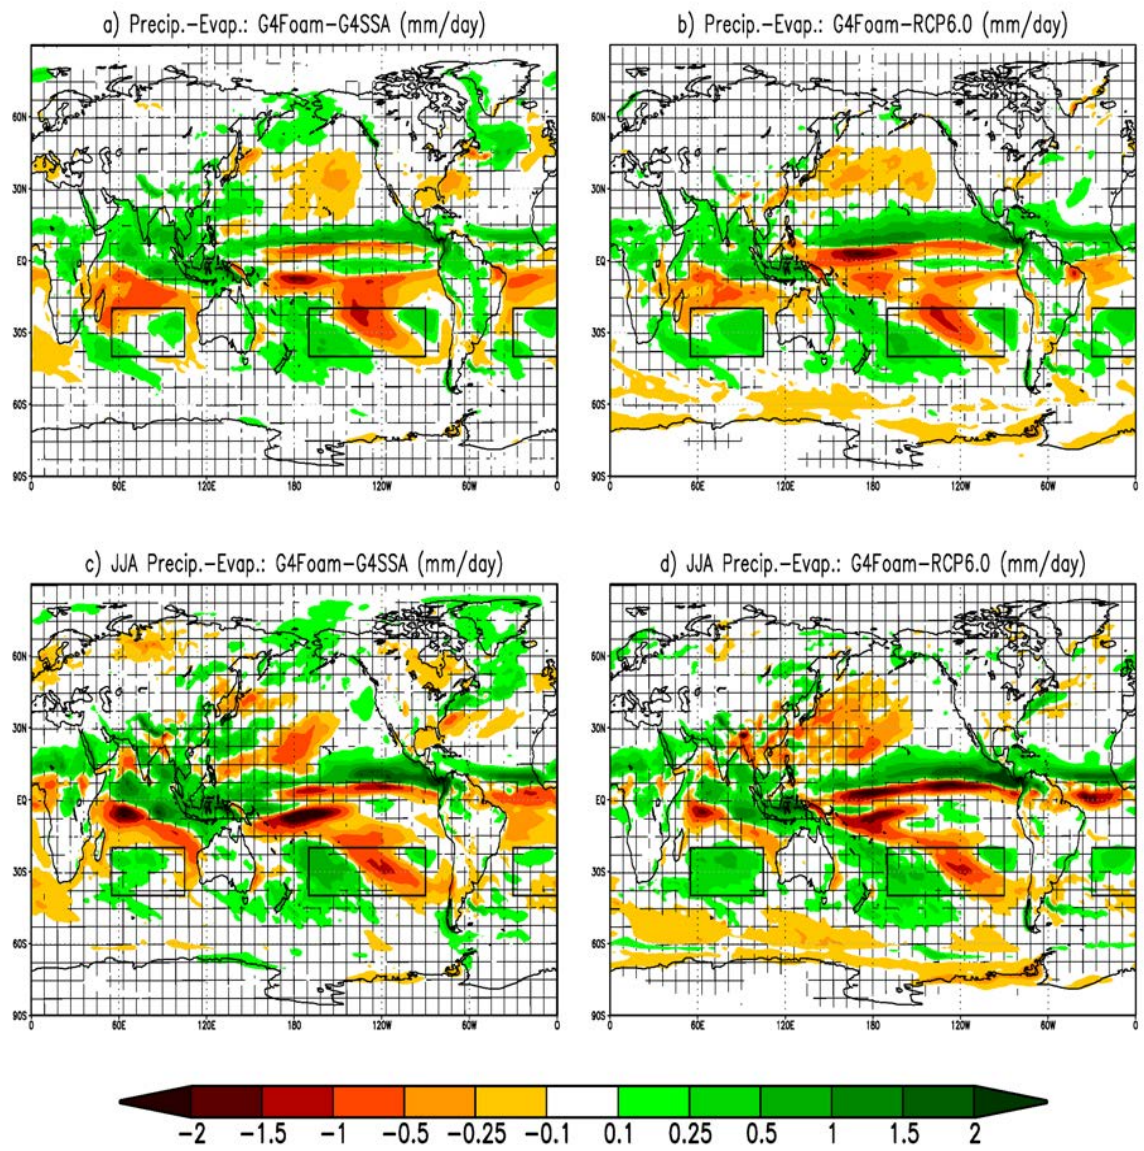

939  
 940  
 941  
 942  
 943  
 944  
 945

**Figure 8.** 2030-2069 precipitation minus evaporation difference (mm/day) between G4Foam and (a) G4SSA, (b) RCP6.0, (c) G4SSA during JJA and (d) RCP6.0 during JJA. Hatched regions are areas with  $p > 0.05$  (where changes are not statistically significant based on a paired  $t$ -test). Black boxes enclose foamed regions.

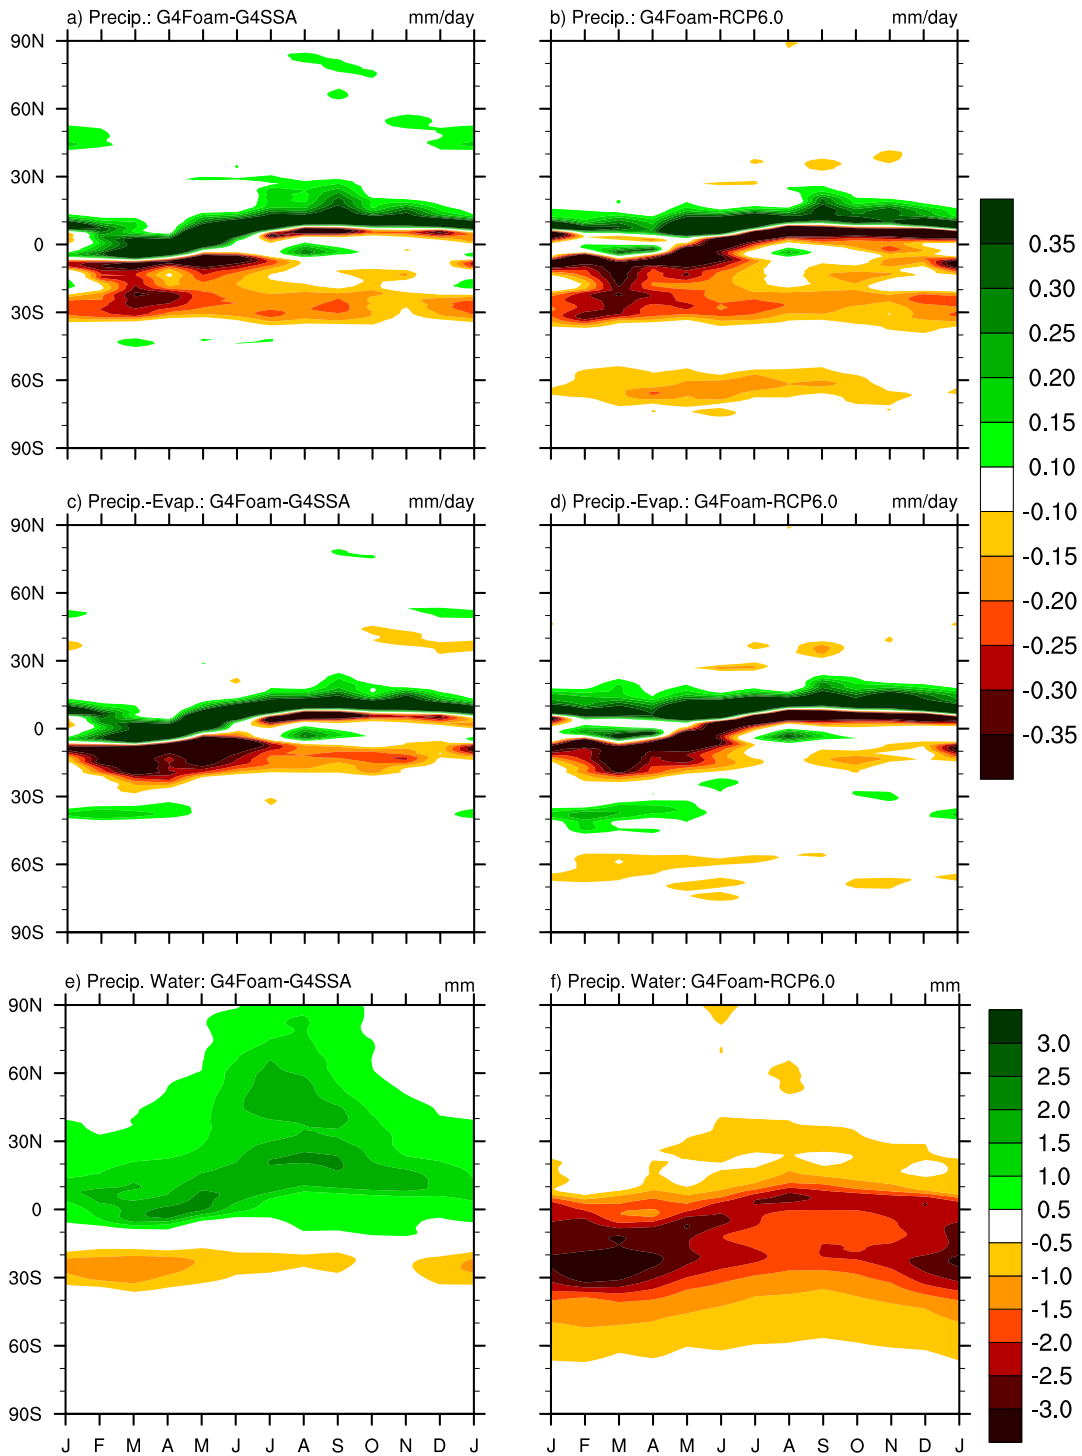

946  
 947 **Figure 9.** 2030-2069 monthly mean annual cycle of zonal mean precipitation (mm/day) for (a)  
 948 G4Foam minus G4SSA and (b) G4Foam minus RCP6.0, precipitation minus evaporation  
 949 (mm/day) for (c) G4Foam minus G4SSA and (d) G4Foam minus RCP6.0, and total precipitable  
 950 water (mm) for (e) G4Foam minus G4SSA and (f) G4Foam minus RCP6.0.  
 951

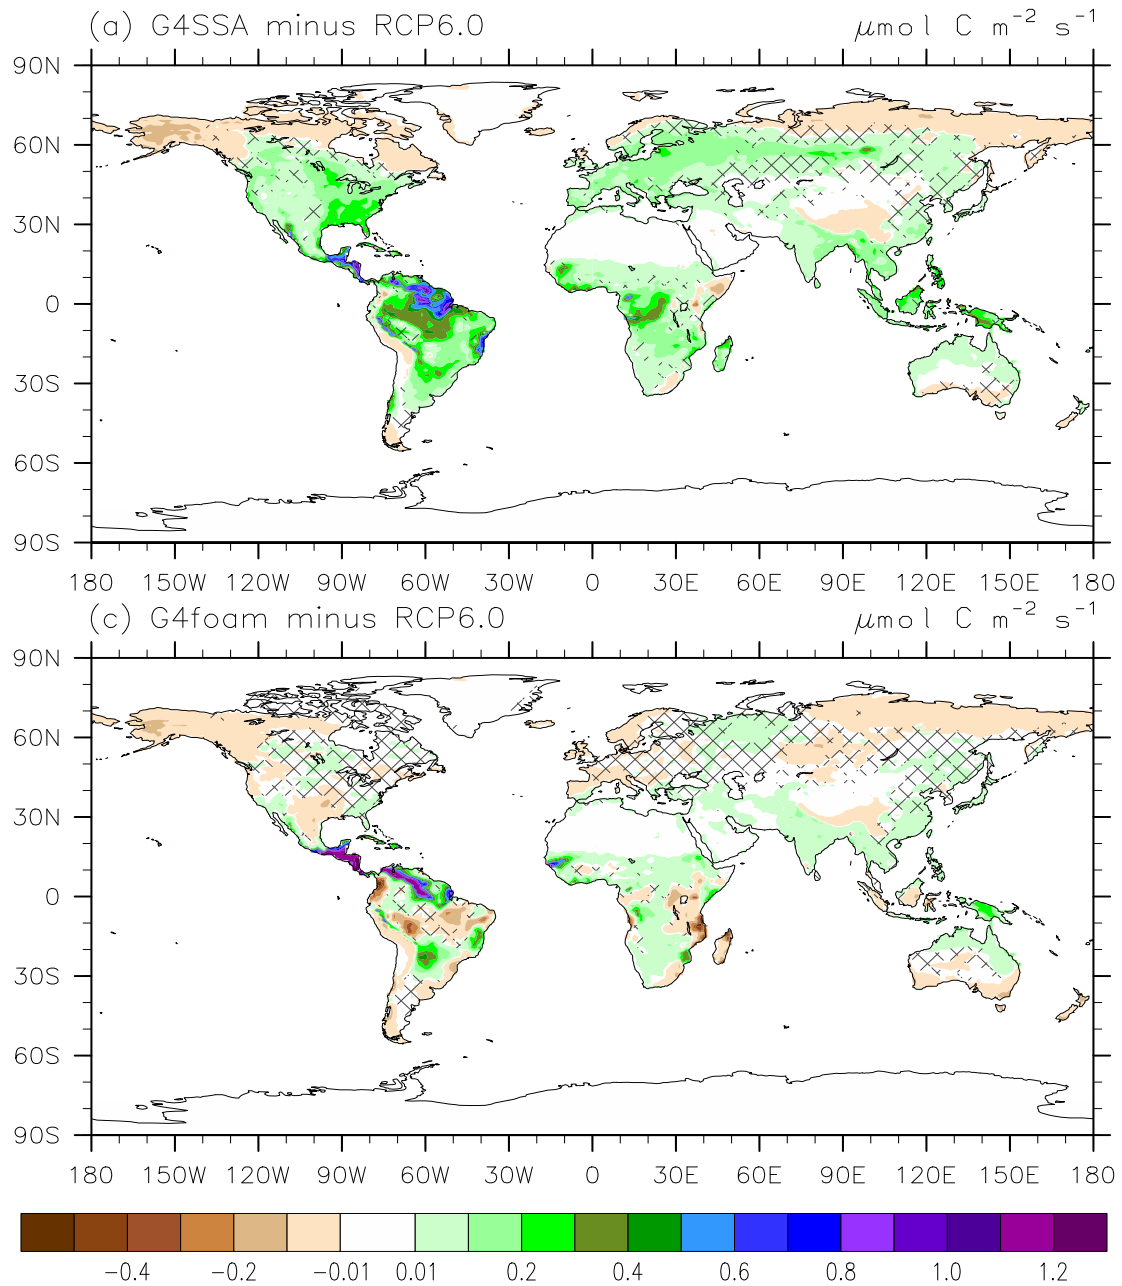

952  
 953 **Figure 10.** (a) Photosynthesis rate differences between G4SSA and RCP6.0 during years 2030–  
 954 2069 (sulfate injection period, excluding the first 10 years) (Fig. 4a from Xia et al., 2016). (b)  
 955 Photosynthesis rate anomaly between G4Foam and RCP6.0 during years 2030–2069 of solar  
 956 reduction. Hatched regions are areas with  $p > 0.05$  (where changes are not statistically  
 957 significant based on a paired t test).
